# Supplementary material for: Palladium incorporated MIL-101(Cr): a heterogeneous and reusable catalyst for the C–H functionalization of unactivated arenes
Source: Royal Society of Chemistry journal article supplement (doi:10.1039/d2nj03889g), 2022-01-01
Supplement: d2nj03889g1.pdf [file d2nj03889g1.pdf]

## Supporting Information

### Palladium incorporated MIL-101(Cr): a heterogeneous and reusable catalyst for the C-H functionalization of unactivated arenes

Phillip Kumar Sarkar,<sup>a</sup> Sushmita Gajurel,<sup>a</sup> Lenida Kyndiah,<sup>a</sup> Rajib Sarkar,<sup>a</sup> Rupesh S. Devan,<sup>b</sup>  
Amarta Kumar Pal<sup>a,\*</sup>

<sup>a</sup>*Department of Chemistry, Centre for Advanced Studies, North-Eastern Hill University, Shillong-793022, Meghalaya, India.*

*E-mail: amartya\_pal22@yahoo.com, akpal@nehu.ac.in Tel: +91 364 2722606*

<sup>b</sup>*Department of Metallurgy Engineering and Materials Science, Indian Institute of Technology Indore, Khandwa Road, Simrol, Indore 453552, India*

| Table of content                                                                                | Page No.  |
|-------------------------------------------------------------------------------------------------|-----------|
| 1. TON and TOF Calculation                                                                      | S2        |
| 2. Single crystal X-ray data of compounds <b>3i</b> and <b>3o</b>                               | S2 - S4   |
| 3. Spectral data of the compounds ( <b>3a-o</b> and <b>5a-5m</b> )                              | S4 - S13  |
| 4. References                                                                                   | S13       |
| 5. <sup>1</sup> H and <sup>13</sup> C NMR spectra of compounds ( <b>3a-o</b> and <b>5a-5m</b> ) | S14 - S41 |

## 1. TON and TOF Calculation.

1. 15 mg (catalyst used) x 0.0246 [Pd weight ratio (2.46 % by ICP) in the catalyst]/106.42

= 0.00347 mmol Pd (Pd mmol for the catalytic reaction)

2. TON = 0.87 (mmol of product)/ 0.00347 (mmol of Pd) = 250.7

3. TOF = 250.7/6 = 41.8 h<sup>-1</sup>

## 2. Single crystal X-ray data of compounds **3i** and **3o**:

Single crystal of **3i** and **3o** were obtained from dichloromethane and ethyl acetate respectively. The X-ray diffraction data were collected at 293 K (296 K for **3i**) using BRUKER D8 VENTURE SC-XRD system, equipped with dual X-ray sources (Mo and Cu), Photon II detector. The software used for data collection was APEX3. The structure were solved by using the program SHELXT and refined by full-matrix least-squares calculations ( $F^2$ ) by using the SHELXL-2018/3 software<sup>1</sup> in WinGX-Version 2021.3.<sup>2</sup>

**Table S1.** X-ray Crystallography data of compound **3i** (CCDC 2217412).

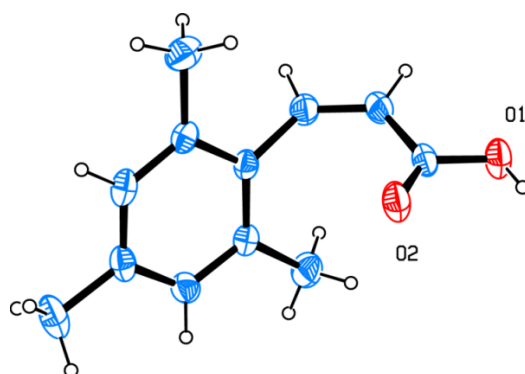

|                   |                                                |
|-------------------|------------------------------------------------|
| Empirical formula | C <sub>12</sub> H <sub>14</sub> O <sub>2</sub> |
| Formula weight    | 190.23                                         |
| Crystal system    | Triclinic                                      |
| T(K)              | 296 (2)                                        |
| Space group       | <i>P</i> -1                                    |
| a(Å)              | 7.8281 (3)                                     |
| b(Å)              | 8.1444 (4)                                     |
| c(Å)              | 8.5668 (4)                                     |
| α(°)              | 81.284 (2)                                     |

|                                                 |                                  |
|-------------------------------------------------|----------------------------------|
| $\beta(^{\circ})$                               | 88.323 (10)                      |
| $\gamma(^{\circ})$                              | 85.455 (10)                      |
| Volume ( $\text{\AA}^3$ )                       | 538.09 (4)                       |
| $\rho$ (calculated) ( $\text{mg mm}^{-3}$ )     | 1.174                            |
| Absorption coefficient ( $\mu/\text{mm}^{-1}$ ) | 0.079                            |
| Total reflection collected                      | 16179                            |
| Independent reflection                          | 2046                             |
| $\theta$ range ( $^{\circ}$ )                   | 2.465 to 28.272                  |
| Final R Indexes [ $I \geq 2\sigma(I)$ ]         | $R_1 = 0.0521$ , $wR_2 = 0.1551$ |
| Final R indexes [all data]                      | $R_1 = 0.0666$ , $wR_2 = 0.1667$ |
| Goodness-of-fit on $F^2$                        | 1.066                            |

**Table S2.** X-ray Crystallography data of compound **3o** (CCDC 2217413).

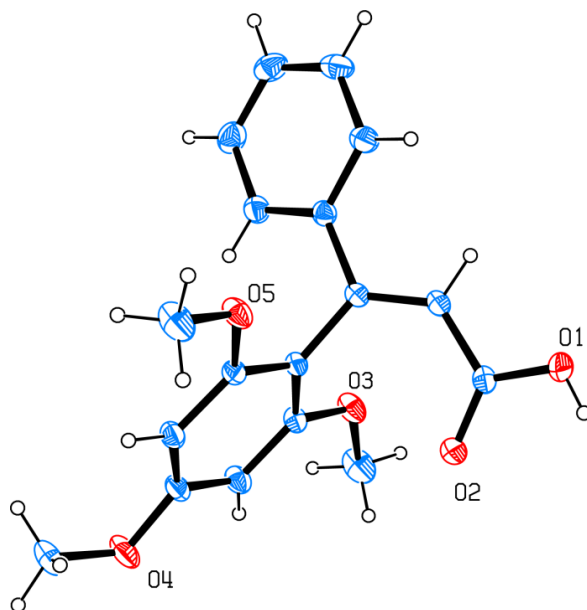

|                   |                                        |
|-------------------|----------------------------------------|
| Empirical formula | $\text{C}_{18}\text{H}_{18}\text{O}_5$ |
| Formula weight    | 314.34                                 |
| Crystal system    | monoclinic                             |
| T(K)              | 293 (2)                                |
| Space group       | $P2_1/c$                               |
| a( $\text{\AA}$ ) | 11.4985 (10)                           |
| b( $\text{\AA}$ ) | 8.0962 (7)                             |

|                                                 |                                  |
|-------------------------------------------------|----------------------------------|
| $c(\text{\AA})$                                 | 17.0148 (16)                     |
| $\alpha(^{\circ})$                              | 90                               |
| $\beta(^{\circ})$                               | 101.743 (3)                      |
| $\gamma(^{\circ})$                              | 90                               |
| Volume ( $\text{\AA}^3$ )                       | 1550.8 (2)                       |
| $\rho$ (calculated) ( $\text{mg mm}^{-3}$ )     | 1.346                            |
| Absorption coefficient ( $\mu/\text{mm}^{-1}$ ) | 0.098                            |
| Total reflection collected                      | 36263                            |
| Independent reflection                          | 3019                             |
| $\theta$ range ( $^{\circ}$ )                   | 2.445 to 28.304                  |
| Final R Indexes [ $I \geq 2\sigma(I)$ ]         | $R_1 = 0.0425$ , $wR_2 = 0.1130$ |
| Final R indexes [all data]                      | $R_1 = 0.0565$ , $wR_2 = 0.1189$ |
| Goodness-of-fit on $F^2$                        | 1.050                            |

### 3. Spectral data of the compounds (3a-o and 5a-5m).

#### 1. (Z)-ethyl 3-mesitylacrylate (3a).<sup>3</sup>

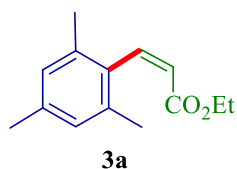

Colourless liquid. <sup>1</sup>H NMR (CDCl<sub>3</sub>, 400 MHz):  $\delta$  = 6.94 (d,  $J$  = 11.6 Hz, 1H), 6.75 (s, 2H), 6.03 (d,  $J$  = 11.6 Hz, 1H), 3.96 (q,  $J$  = 7.2 Hz, 2H), 2.17 (s, 3H), 2.06 (s, 6H), 1.02 (t,  $J$  = 7.2 Hz, 3H). <sup>13</sup>C NMR (CDCl<sub>3</sub>, 100 MHz):  $\delta$  = 165.4, 144.2, 136.7, 134.5, 132.9, 127.9, 122.8, 59.9, 21.1, 20.2, 14.0. HRMS (ESI,  $m/z$ ) calcd. for C<sub>14</sub>H<sub>18</sub>O<sub>2</sub> [M+Na]<sup>+</sup>: 241.1204; found: 241.1215.

#### 2. (Z)-ethyl 3-(2,3,4,5,6-pentamethylphenyl)acrylate (3b).<sup>3</sup>

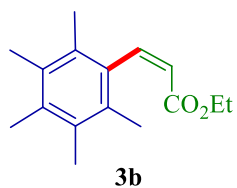

White Solid.  $^1\text{H NMR}$  ( $\text{CDCl}_3$ , 400 MHz):  $\delta = 7.06$  (d,  $J = 12$  Hz, 1H), 6.06 (d,  $J = 12$  Hz, 1H), 3.96 (q,  $J = 7$  Hz, 2H), 2.14 (s, 3H), 2.11 (s, 6H), 2.05 (s, 6H), 1.04 (t,  $J = 7$  Hz, 3H).  $^{13}\text{C NMR}$  ( $\text{CDCl}_3$ , 100 MHz):  $\delta = 165.4, 146.6, 134.0, 133.2, 131.9, 129.7, 122.1, 59.8, 17.6, 16.7, 16.4, 14.0$ . **HRMS** (ESI,  $m/z$ ) calcd. for  $\text{C}_{16}\text{H}_{22}\text{O}_2$   $[\text{M}+\text{Na}]^+$ : 269.1517; found: 269.1510.

### 3. (Z)-methyl 3-mesitylacrylate (3c).<sup>3</sup>

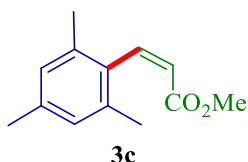

Colourless liquid.  $^1\text{H NMR}$  ( $\text{CDCl}_3$ , 400 MHz):  $\delta = 7.06$  (d,  $J = 11.6$  Hz, 1H), 6.85 (s, 2H), 6.15 (d,  $J = 11.6$  Hz, 1H), 3.59 (s, 3H), 2.27 (s, 3H), 2.15 (s, 6H).  $^{13}\text{C NMR}$  ( $\text{CDCl}_3$ , 100 MHz):  $\delta = 165.8, 144.7, 136.8, 134.5, 132.5, 127.9, 122.1, 51.2, 21.1, 20.1$ . **HRMS** (ESI,  $m/z$ ) calcd. for  $\text{C}_{13}\text{H}_{16}\text{O}_2$   $[\text{M}+\text{Na}]^+$ : 227.1048; found: 227.1060.

### 4. (Z)-methyl 3-(2,3,4,5,6-pentamethylphenyl)acrylate (3d).<sup>3</sup>

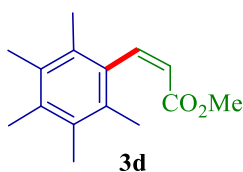

White Solid.  $^1\text{H NMR}$  ( $\text{CDCl}_3$ , 400 MHz):  $\delta = 7.09$  (d,  $J = 12$  Hz, 1H), 6.10 (d,  $J = 12$  Hz, 1H), 3.52 (s, 3H), 2.15 (s, 3H), 2.13 (s, 6H), 2.07 (s, 6H).  $^{13}\text{C NMR}$  ( $\text{CDCl}_3$ , 100 MHz):  $\delta = 165.7, 147.0, 134.1, 133.0, 132.0, 129.8, 121.5, 51.1, 17.6, 16.8, 16.4$ . **HRMS** (ESI,  $m/z$ ) calcd. for  $\text{C}_{12}\text{H}_{20}\text{O}_2$   $[\text{M}+\text{Na}]^+$ : 255.1361; found: 255.1366.

### 5. (Z)-ethyl 3-(2,3,5,6-tetramethylphenyl)acrylate (3e).<sup>3</sup>

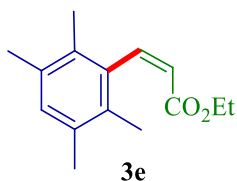

White Solid.  $^1\text{H NMR}$  ( $\text{CDCl}_3$ , 400 MHz):  $\delta = 7.10$  (d,  $J = 12$  Hz, 1H), 6.90 (s, 1H), 6.15 (d,  $J = 12$  Hz, 1H), 4.03 (q,  $J = 7.2$  Hz, 2H), 2.21 (s, 6H), 2.08 (s, 6H), 1.08 (t,  $J = 7.2$  Hz, 3H).

$^{13}\text{C}$  NMR ( $\text{CDCl}_3$ , 100 MHz):  $\delta = 165.5, 145.6, 135.7, 133.1, 130.5, 130.2, 122.5, 59.8, 19.9, 16.5, 13.9$ . HRMS (ESI,  $m/z$ ) calcd. for  $\text{C}_{15}\text{H}_{20}\text{O}_2$   $[\text{M}+\text{Na}]^+$ : 255.1361; found: 255.1358.

6. (Z)-methyl 3-(2,3,5,6-tetramethylphenyl)acrylate (3f).<sup>3</sup>

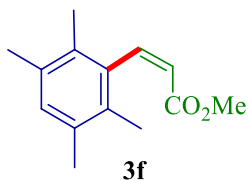

White Solid.  $^1\text{H}$  NMR ( $\text{CDCl}_3$ , 400 MHz):  $\delta = 7.14$  (d,  $J = 12$  Hz, 1H), 6.93 (s, 1H), 6.20 (d,  $J = 12$  Hz, 1H), 3.60 (s, 3H), 2.24 (s, 6H), 2.10 (s, 6H).  $^{13}\text{C}$  NMR ( $\text{CDCl}_3$ , 100 MHz):  $\delta = 165.7, 146.2, 135.4, 133.1, 130.7, 130.0, 121.8, 51.2, 20.0, 16.5$ . HRMS (ESI,  $m/z$ ) calcd. for  $\text{C}_{14}\text{H}_{18}\text{O}_2$   $[\text{M}+\text{Na}]^+$ : 241.1204; found: 241.1205.

7. (E)-ethyl 3-(2,4,6-trimethoxyphenyl)acrylate (3g).<sup>4</sup>

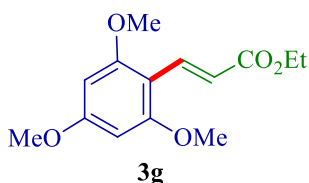

White Solid.  $^1\text{H}$  NMR ( $\text{CDCl}_3$ , 400 MHz):  $\delta = 8.10$  (d,  $J = 16.4$  Hz, 1H), 6.77 (d,  $J = 16.4$  Hz, 1H), 6.10 (s, 2H), 4.26 (q,  $J = 7$  Hz, 2H), 3.86 (s, 6H), 3.84 (s, 3H), 1.34 (t,  $J = 7$  Hz, 3H).  $^{13}\text{C}$  NMR ( $\text{CDCl}_3$ , 100 MHz):  $\delta = 169.0, 162.7, 161.2, 135.4, 117.5, 105.8, 90.3, 59.9, 55.6, 55.3, 14.4$ . HRMS (ESI,  $m/z$ ) calcd. for  $\text{C}_{14}\text{H}_{18}\text{O}_5$   $[\text{M}+\text{Na}]^+$ : 289.1052; found: 289.1068.

8. (Z)-3-(2,5-dimethylphenyl)acrylic acid (3h).<sup>5</sup>

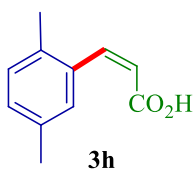

White Solid.  $^1\text{H}$  NMR ( $\text{CDCl}_3$ , 300 MHz):  $\delta = 7.21$  (d,  $J = 12$  Hz, 1H), 7.13 (s, 1H), 7.07-7.01 (m, 2H), 6.01 (d,  $J = 12$  Hz, 1H), 2.28 (s, 3H), 2.23 (s, 3H).  $^{13}\text{C}$  NMR ( $\text{CDCl}_3$ , 100 MHz):  $\delta = 169.9, 145.6, 134.7, 134.2, 132.7, 129.7, 129.5, 129.3, 119.7, 20.8, 19.3$ . HRMS (ESI,  $m/z$ ) calcd. for  $\text{C}_{11}\text{H}_{12}\text{O}_2$   $[\text{M}+\text{Na}]^+$ : 199.0735; found: 199.0747.

9. (Z)-3-mesitylacrylic acid (**3i**).<sup>6</sup>

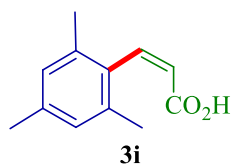

White Solid. <sup>1</sup>H NMR (CDCl<sub>3</sub>, 300 MHz): δ = 7.11 (d, *J* = 12 Hz, 1H), 6.83 (s, 2H), 6.11 (d, *J* = 12 Hz, 1H), 2.26 (s, 3H), 2.14 (s, 6H). <sup>13</sup>C NMR (CDCl<sub>3</sub>, 100 MHz): δ = 170.4, 146.2, 137.1, 134.6, 132.0, 128.0, 122.1, 21.0, 20.1. HRMS (ESI, *m/z*) calcd. for C<sub>12</sub>H<sub>14</sub>O<sub>2</sub> [M+Na]<sup>+</sup>: 213.0891; found: 213.0919.

10. (Z)-3-(2,3,4,5,6-pentamethylphenyl)acrylic acid (**3j**).<sup>3</sup>

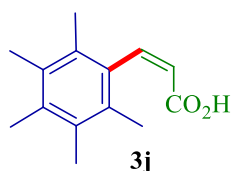

White Solid. <sup>1</sup>H NMR (CDCl<sub>3</sub>, 300 MHz): δ = 7.22 (d, *J* = 12 Hz, 1H), 6.14 (d, *J* = 12 Hz, 1H), 2.22 (s, 3H), 2.18 (s, 6H), 2.12 (s, 6H). <sup>13</sup>C NMR (CDCl<sub>3</sub>, 100 MHz): δ = 169.1, 148.1, 134.7, 132.4, 132.1, 130.0, 121.7, 17.6, 16.8, 16.4. HRMS (ESI, *m/z*) calcd. for C<sub>14</sub>H<sub>18</sub>O<sub>2</sub> [M+Na]<sup>+</sup>: 241.1204; found: 241.1228.

11. (Z)-3-(2,3,5,6-tetramethylphenyl)acrylic acid (**3k**).

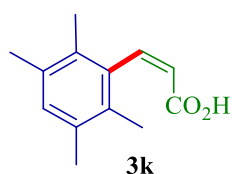

White Solid. <sup>1</sup>H NMR (CDCl<sub>3</sub>, 300 MHz): δ = 7.19 (d, *J* = 12 Hz, 1H), 6.91 (s, 1H), 6.16 (d, *J* = 12 Hz, 1H), 2.20 (s, 6H), 2.07 (s, 6H). <sup>13</sup>C NMR (CDCl<sub>3</sub>, 100 MHz): δ = 169.5, 147.5, 134.8, 133.4, 131.0, 130.4, 121.9, 19.9, 16.5. HRMS (ESI, *m/z*) calcd. for C<sub>13</sub>H<sub>16</sub>O<sub>2</sub> [M+Na]<sup>+</sup>: 227.1048; found: 227.1049.

12. (Z)-3-mesityl-3-phenylacrylic acid (**3l**).<sup>7</sup>

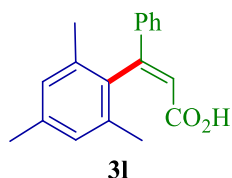

White Solid.  $^1\text{H NMR}$  ( $\text{CDCl}_3$ , 300 MHz):  $\delta = 7.38\text{-}7.33$  (m, 5H), 6.92 (s, 2H), 6.62 (s, 1H), 2.34 (s, 3H), 2.04 (s, 6H).  $^{13}\text{C NMR}$  ( $\text{CDCl}_3$ , 100 MHz):  $\delta = 169.4$ , 157.1, 138.1, 137.1, 134.7, 134.3, 129.9, 128.7, 128.2, 127.1, 116.9, 21.1, 19.7. **HRMS** (ESI, m/z) calcd. for  $\text{C}_{18}\text{H}_{18}\text{O}_2$   $[\text{M}+\text{Na}]^+$ : 289.1204; found: 289.1205.

13. **(Z)-3-(2,3,4,5,6-pentamethylphenyl)-3-phenylacrylic acid (3m).**<sup>3</sup>

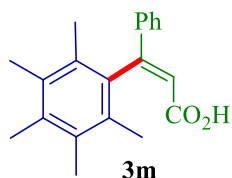

White Solid.  $^1\text{H NMR}$  ( $\text{CDCl}_3$ , 400 MHz):  $\delta = 7.38\text{-}7.33$  (m, 5H), 6.69 (s, 1H), 2.30 (s, 3H), 2.24 (s, 6H), 2.05 (s, 6H).  $^{13}\text{C NMR}$  ( $\text{CDCl}_3$ , 100 MHz):  $\delta = 167.2$ , 157.7, 138.3, 135.5, 133.4, 133.1, 130.5, 129.8, 128.7, 127.2, 117.1, 17.5, 16.9, 16.5. **HRMS** (ESI, m/z) calcd. for  $\text{C}_{20}\text{H}_{22}\text{O}_2$   $[\text{M}+\text{Na}]^+$ : 317.1517; found: 317.1542.

14. **(Z)-3-(2,3,5,6-tetramethylphenyl)-3-phenylacrylic acid (3n).**<sup>8</sup>

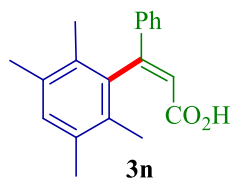

White Solid.  $^1\text{H NMR}$  ( $\text{CDCl}_3$ , 400 MHz):  $\delta = 7.38\text{-}7.32$  (m, 5H), 7.03 (s, 1H), 6.68 (s, 1H), 2.26 (s, 6H), 1.99 (s, 6H).  $^{13}\text{C NMR}$  ( $\text{CDCl}_3$ , 100 MHz):  $\delta = 167.7$ , 157.5, 138.2, 133.9, 131.4, 130.8, 129.9, 128.7, 127.2, 116.8, 20.0, 16.3. **HRMS** (ESI, m/z) calcd. for  $\text{C}_{19}\text{H}_{20}\text{O}_2$   $[\text{M}+\text{Na}]^+$ : 303.1361; found: 303.1353.

15. **(Z)-3-(2,4,6-trimethoxyphenyl)-3-phenylacrylic acid (3o).**



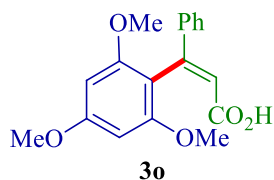

White Solid.  $^1\text{H NMR}$  ( $\text{CDCl}_3$ , 400 MHz):  $\delta = 7.37\text{-}7.30$  (m, 5H), 6.51 (s, 1H), 6.20 (s, 2H), 3.88 (s, 3H), 3.67 (s, 6H).  $^{13}\text{C NMR}$  ( $\text{CDCl}_3$ , 100 MHz):  $\delta = 168.1, 161.7, 158.0, 150.6, 129.1, 128.3, 126.9, 118.6, 90.9, 55.9, 55.32$ . **HRMS** (ESI,  $m/z$ ) calcd. for  $\text{C}_{18}\text{H}_{18}\text{O}_5$   $[\text{M}+\text{Na}]^+$ : 337.1052; found: 337.1056.

16. **1,3,5-trimethyl-2-(1-phenylvinyl)benzene (5a)**.<sup>3</sup>

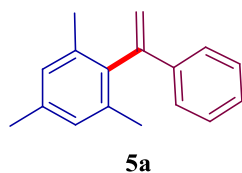

Colourless liquid.  $^1\text{H NMR}$  ( $\text{CDCl}_3$ , 400 MHz):  $\delta = 7.35\text{-}7.32$  (m, 5H), 6.99 (s, 2H), 6.03 (s, 1H), 5.17 (s, 1H), 2.40 (s, 3H), 2.20 (s, 6H).  $^{13}\text{C NMR}$  ( $\text{CDCl}_3$ , 100 MHz):  $\delta = 147.1, 139.7, 138.3, 136.6, 136.3, 128.6, 128.3, 127.7, 126.0, 114.6, 21.2, 20.3$ .

17. **1,2,3,4,5-pentamethyl-6-(1-phenylvinyl)benzene (5b)**.<sup>3</sup>

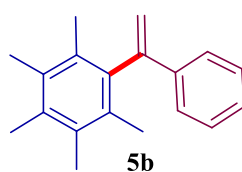

White solid.  $^1\text{H NMR}$  ( $\text{CDCl}_3$ , 400 MHz):  $\delta = 7.23\text{-}7.15$  (m, 5H), 5.89 (d,  $J = 0.8$  Hz, 1H), 4.99 (d,  $J = 0.8$  Hz, 1H), 2.21 (s, 3H), 2.16 (s, 6H), 2.02 (s, 6H).  $^{13}\text{C NMR}$  ( $\text{CDCl}_3$ , 100 MHz):  $\delta = 148.6, 140.0, 138.7, 133.7, 132.3, 131.6, 128.3, 127.4, 126.0, 114.3, 17.9, 16.8, 16.6$ .

18. **1,3,5-trimethyl-2-(1-(*m*-tolyl)vinyl)benzene (5c)**.<sup>3</sup>

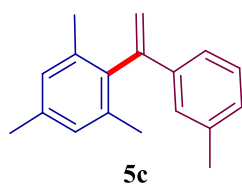

Colourless liquid.  $^1\text{H NMR}$  ( $\text{CDCl}_3$ , 400 MHz):  $\delta = 7.16\text{--}7.13$  (m, 2H), 7.06–7.02 (m, 2H), 6.90 (s, 2H), 5.93 (d,  $J = 1.2$  Hz, 1H), 5.06 (d,  $J = 1.2$  Hz, 1H), 2.31 (s, 3H), 2.30 (s, 3H), 2.11 (s, 6H).  $^{13}\text{C NMR}$  ( $\text{CDCl}_3$ , 100 MHz):  $\delta = 147.0$ , 139.6, 138.3, 137.9, 136.4, 136.1, 128.4, 128.3, 128.1, 126.4, 123.1, 114.5, 21.6, 21.1, 20.2.

19. **2-(1-(4-methoxyphenyl)vinyl)-1,3,5-trimethylbenzene (5e).**<sup>9</sup>

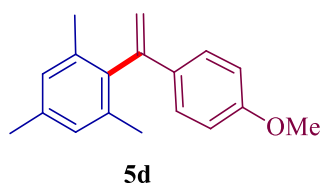

Colourless liquid.  $^1\text{H NMR}$  ( $\text{CDCl}_3$ , 400 MHz):  $\delta = 7.21\text{--}7.18$  (m, 2H), 6.90 (s, 2H), 6.81–6.77 (m, 2H), 5.83 (d,  $J = 1.2$  Hz, 1H), 4.97 (d,  $J = 1.2$  Hz, 1H), 3.77 (s, 3H), 2.31 (s, 3H), 2.10 (s, 6H).  $^{13}\text{C NMR}$  ( $\text{CDCl}_3$ , 100 MHz):  $\delta = 159.2$ , 146.2, 138.4, 136.3, 136.1, 132.2, 128.1, 127.1, 113.8, 112.5, 55.2, 21.1, 20.1.

20. **1-(1-(4-methoxyphenyl)vinyl)-2,3,4,5,6-pentamethylbenzene (5f).**<sup>3</sup>

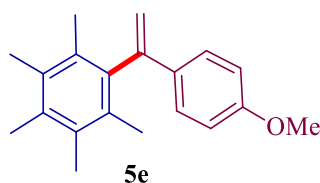

White solid.  $^1\text{H NMR}$  ( $\text{CDCl}_3$ , 400 MHz):  $\delta = 7.17$  (d,  $J = 8.8$  Hz, 2H), 6.75 (d,  $J = 8.8$  Hz, 2H), 5.79 (d,  $J = 1.2$  Hz, 1H), 4.89 (d,  $J = 0.8$  Hz, 1H), 3.72 (s, 3H), 2.22 (s, 3H), 2.17 (s, 6H), 2.04 (s, 6H).  $^{13}\text{C NMR}$  ( $\text{CDCl}_3$ , 100 MHz):  $\delta = 159.1$ , 147.9, 138.9, 133.6, 132.7, 132.3, 131.5, 127.2, 113.7, 112.3, 55.2, 17.8, 16.8, 16.6.

21. **1,2,3,4,5-pentamethyl-6-(1-(*m*-tolyl)vinyl)benzene (5d).**

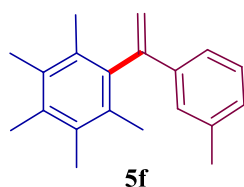

White solid.  $^1\text{H NMR}$  ( $\text{CDCl}_3$ , 400 MHz):  $\delta = 7.17\text{--}7.13$  (m, 2H), 7.06–7.02 (m, 2H), 5.94 (d,  $J = 0.8$  Hz, 1H), 5.03 (d,  $J = 0.8$  Hz, 1H), 2.31 (s, 3H), 2.28 (s, 3H), 2.23 (s, 6H), 2.10 (s,

6H).  $^{13}\text{C}$  NMR ( $\text{CDCl}_3$ , 100 MHz):  $\delta = 163.5, 161.1, 147.5, 138.4, 136.16, 136.13, 133.9, 132.4, 131.4, 127.7, 127.6, 115.3, 115.1, 114.04, 114.02, 29.7, 17.8, 16.8, 16.6$ .

22. **1,3,5-trimethyl-2-(1-(*p*-tolyl)vinyl)benzene (5g).**<sup>3</sup>

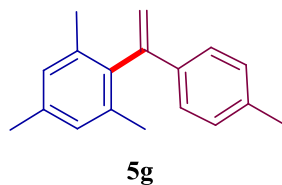

Colourless liquid.  $^1\text{H}$  NMR ( $\text{CDCl}_3$ , 400 MHz):  $\delta = 7.17$  (d,  $J = 8$  Hz, 2H),  $7.07$  (d,  $J = 8$  Hz, 2H),  $6.90$  (s, 2H),  $5.91$  (d,  $J = 1.2$  Hz, 1H),  $5.03$  (d,  $J = 1.2$  Hz, 1H),  $2.31$  (s, 6H),  $2.10$  (s, 6H).  $^{13}\text{C}$  NMR ( $\text{CDCl}_3$ , 100 MHz):  $\delta = 146.8, 138.5, 137.4, 136.8, 136.4, 136.2, 129.3, 128.2, 125.8, 113.6, 21.29, 21.23, 20.2$ .

23. **1,2,3,4,5-pentamethyl-6-(1-(*p*-tolyl)vinyl)benzene (5h).**<sup>10</sup>

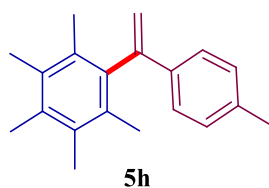

White solid.  $^1\text{H}$  NMR ( $\text{CDCl}_3$ , 400 MHz):  $\delta = 7.14$  (d,  $J = 8$  Hz, 2H),  $7.03$  (d,  $J = 8$  Hz, 2H),  $5.87$  (d,  $J = 0.8$  Hz, 1H),  $4.95$  (d,  $J = 1.2$  Hz, 1H),  $2.26$  (s, 3H),  $2.23$  (s, 3H),  $2.18$  (s, 6H),  $2.04$  (s, 6H).  $^{13}\text{C}$  NMR ( $\text{CDCl}_3$ , 100 MHz):  $\delta = 148.4, 138.9, 137.3, 137.2, 133.6, 132.3, 131.6, 129.1, 125.9, 113.4, 21.1, 17.9, 16.8, 16.3$ .

24. **2-(1-(4-fluorophenyl)vinyl)-1,3,5-trimethylbenzene (5i).**<sup>3</sup>

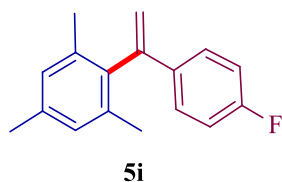

Colourless liquid.  $^1\text{H}$  NMR ( $\text{CDCl}_3$ , 400 MHz):  $\delta = 7.25$ - $7.21$  (m, 2H),  $6.97$ - $6.91$  (m, 4H),  $5.88$  (s, 1H),  $5.06$  (s, 1H),  $2.31$  (s, 3H),  $2.09$  (s, 6H).  $^{13}\text{C}$  NMR ( $\text{CDCl}_3$ , 100 MHz):  $\delta = 163.6, 161.2, 145.8, 137.9, 136.6, 136.0, 135.7, 135.6, 128.2, 127.5, 127.4, 115.3, 115.1, 114.28, 114.27, 21.07, 21.06$ .

25. 1-(1-(4-fluorophenyl)vinyl)-2,3,4,5,6-pentamethylbenzene (**5j**).<sup>11</sup>

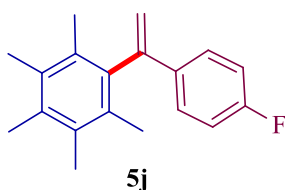

White solid. <sup>1</sup>H NMR (CDCl<sub>3</sub>, 400 MHz): δ = 7.20-7.17 (m, 2H), 6.91-6.85 (m, 2H), 5.83 (s, 1H), 4.97 (s, 1H), 2.22 (s, 3H), 2.17 (s, 6H), 2.02 (s, 6H). <sup>13</sup>C NMR (CDCl<sub>3</sub>, 100 MHz): δ = 162.5, 160.0, 146.5, 137.4, 135.08, 135.05, 132.8, 131.4, 130.4, 126.6, 126.5, 114.2, 114.0, 112.9, 16.7, 15.7, 15.5.

26. 1,2,4,5-tetramethyl-3-(1-phenylvinyl)benzene (**5k**).<sup>10</sup>

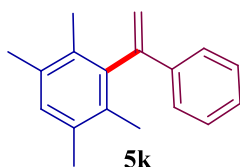

White solid. <sup>1</sup>H NMR (CDCl<sub>3</sub>, 400 MHz): δ = 7.31-7.27 (m, 5H), 7.00 (s, 1H), 6.01 (s, 1H), 5.10 (s, 1H), 2.28 (s, 6H), 2.07 (s, 6H). <sup>13</sup>C NMR (CDCl<sub>3</sub>, 100 MHz): δ = 148.0, 141.0, 139.7, 133.5, 132.0, 130.3, 128.4, 127.5, 125.9, 114.2, 20.2, 16.7.

27. 3-(1-(4-methoxyphenyl)vinyl)-1,2,4,5-tetramethylbenzene (**5l**).<sup>11</sup>

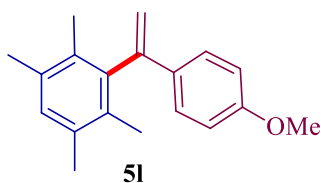

White solid. <sup>1</sup>H NMR (CDCl<sub>3</sub>, 400 MHz): δ = 7.25 (d, *J* = 8.8 Hz, 2H), 6.99 (s, 1H), 6.84 (d, *J* = 8.4 Hz, 2H), 5.89 (s, 1H), 4.97 (s, 1H), 3.81 (s, 3H), 2.27 (s, 6H), 2.07 (s, 6H). <sup>13</sup>C NMR (CDCl<sub>3</sub>, 75 MHz): δ = 159.4, 147.6, 141.5, 133.7, 132.7, 132.1, 130.4, 127.3, 113.9, 112.3, 55.4, 20.3, 16.7.

28. 1-(1-phenylvinyl)naphthalene (**5m**).<sup>9</sup>

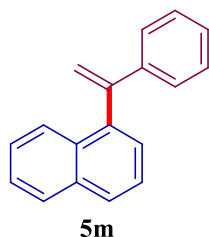

White solid.  $^1\text{H NMR}$  ( $\text{CDCl}_3$ , 400 MHz):  $\delta$  = 7.90 (dd,  $J$  = 3.2, 8 Hz, 2H), 7.80 (d,  $J$  = 8.4 Hz, 1H), 7.55 (t,  $J$  = 7.6 Hz, 1H), 7.47-7.44 (m, 2H), 7.37-7.34 (m, 3H), 7.31-7.25 (m, 3H), 6.01 (s, 1H), 5.42 (s, 1H).  $^{13}\text{C NMR}$  ( $\text{CDCl}_3$ , 75 MHz):  $\delta$  = 148.5, 141.3, 140.0, 133.9, 132.1, 128.5, 128.3, 128.1, 127.9, 127.4, 126.8, 126.6, 126.0, 125.8, 125.6, 116.4.

#### 4. Reference

- (1) G. M. Sheldrick, *Acta Cryst.*, 2015, **C71**, 3-8.
- (2) L. J. Farrugia, *J. Appl. Cryst.*, 2012, **45**, 849-854.
- (3) P. K. Hota, A. Jose and S. K. Mandal, *Organometallics*, 2017, **36**, 4422-4431.
- (4) Z. Shi and C. He, *J. Org. Chem.*, 2004, **69**, 3669-3671.
- (5) J. Oyamada, T. Hashimoto and T. Kitamura, *J. Organomet. Chem.*, 2009, **694**, 3626-3632.
- (6) J. Oyamada and T. Kitamura, *Tetrahedron*, 2007, **63**, 12754-12762.
- (7) R. Saravanakumar, V. Ramkumar and S. Sankararaman, *Organometallics*, 2011, **30**, 1689-1694.
- (8) T. Hashimoto, S. Kutubi, T. Izumi, A. Rahman and T. Kitamura, *J. Organomet. Chem.*, 2011, **696**, 99-105.
- (9) 7R. Li, S. R. Wang and W. Lu, *Org. Lett.*, 2007, **9**, 2219-2222.
- (10) S. V. Bhilare, N. B. Darvatkar, A. R. Deorukhkar, D. G. Raut, G. K. Trivedi and M. M. Salunkhe, *Tetrahedron Lett.*, 2009, **50**, 893-896.
- (11) A. Rahman, O. Ogawa, J. Oyamada and T. Kitamura, *Synthesis*, 2008, **23**, 3755-3760.

## 5. $^1\text{H}$ and $^{13}\text{C}$ NMR spectra of compounds (3a-o and 5a-5m).

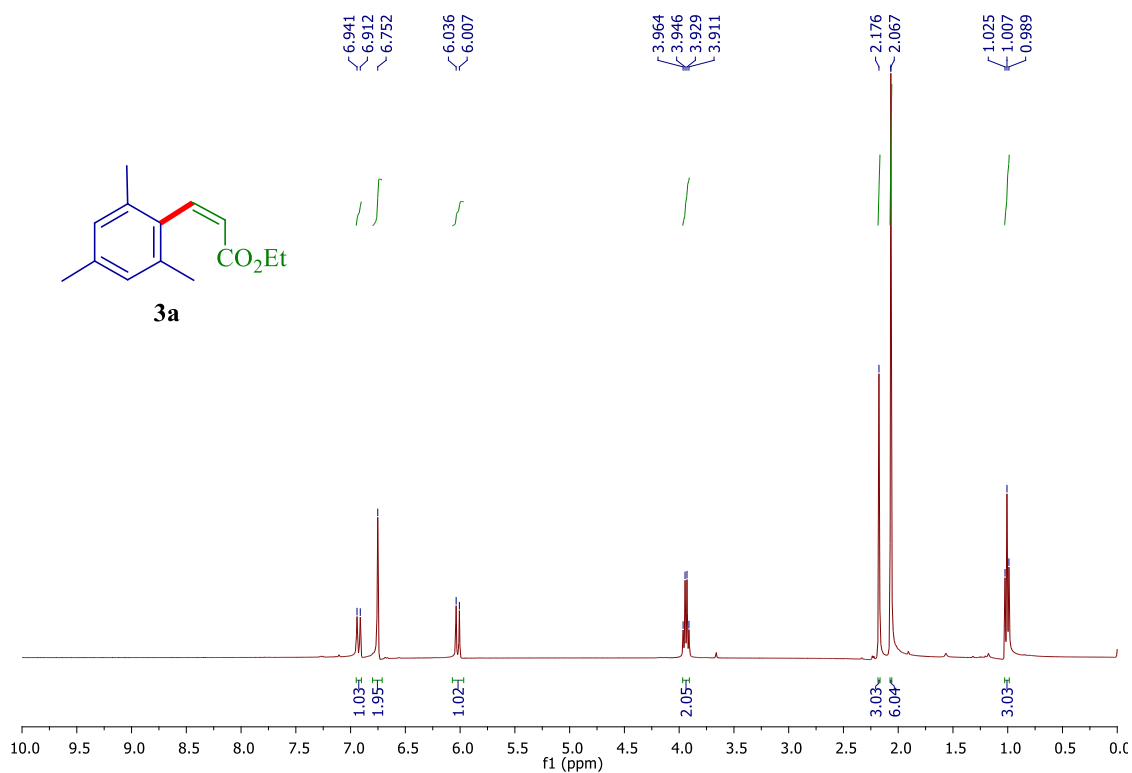

**Figure S1.**  $^1\text{H}$  NMR Spectrum of **3a** in  $\text{CDCl}_3$ .

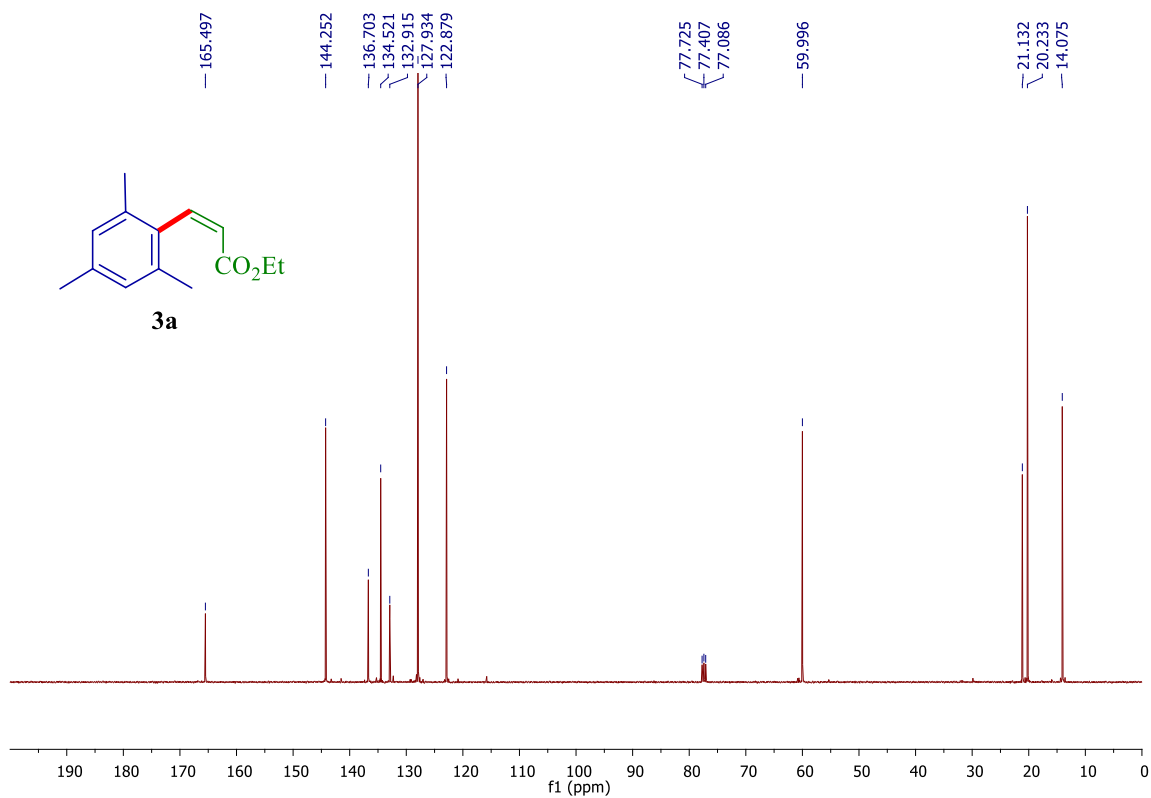

**Figure S2.**  $^{13}\text{C}$  NMR Spectrum of **3a** in  $\text{CDCl}_3$ .

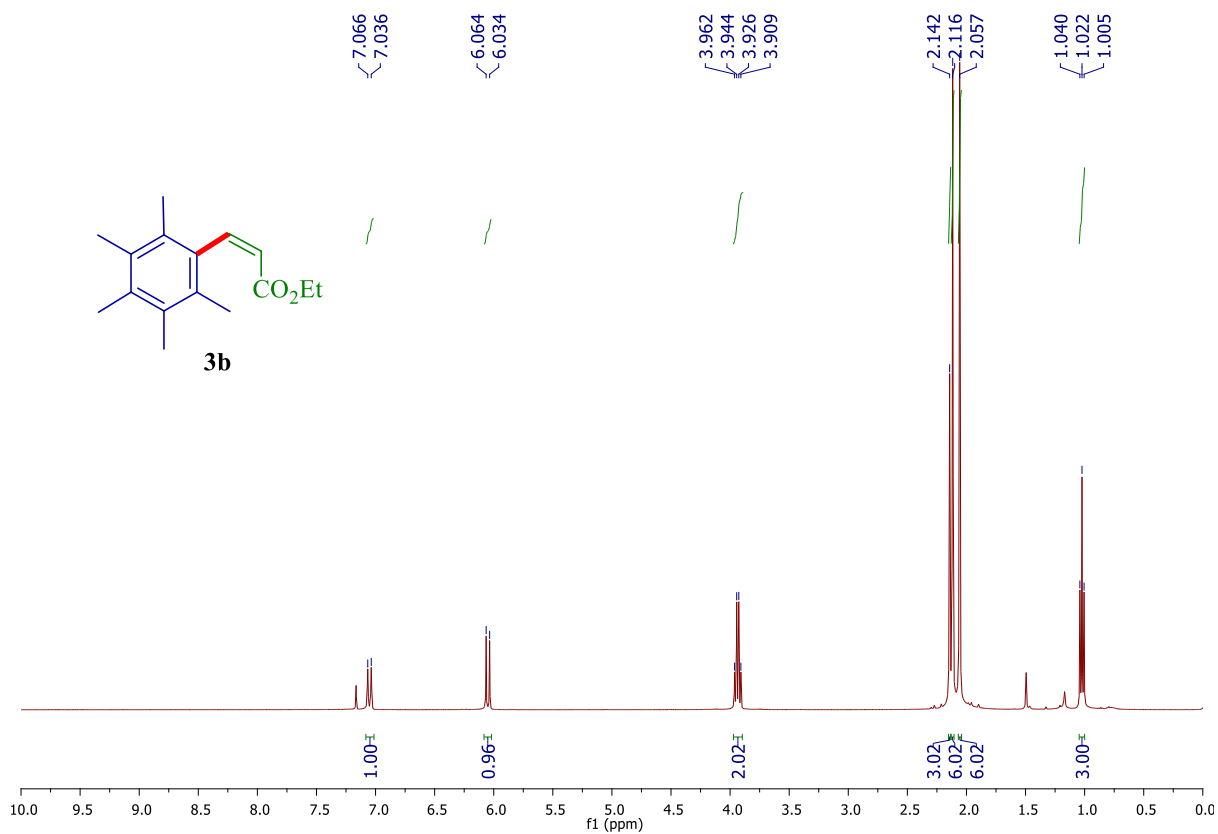

**Figure S3.**  $^1\text{H}$  NMR Spectrum of **3b** in  $\text{CDCl}_3$ .

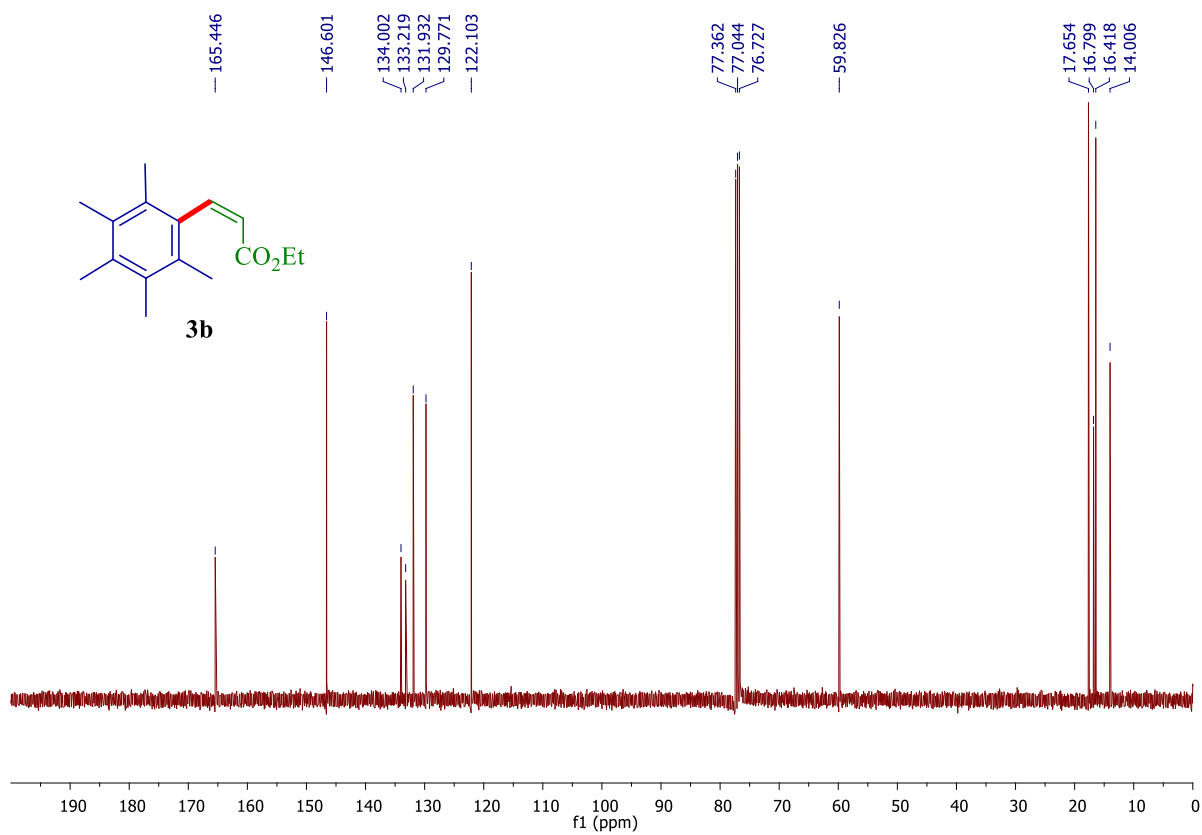

**Figure S4.**  $^{13}\text{C}$  NMR Spectrum of **3b** in  $\text{CDCl}_3$ .

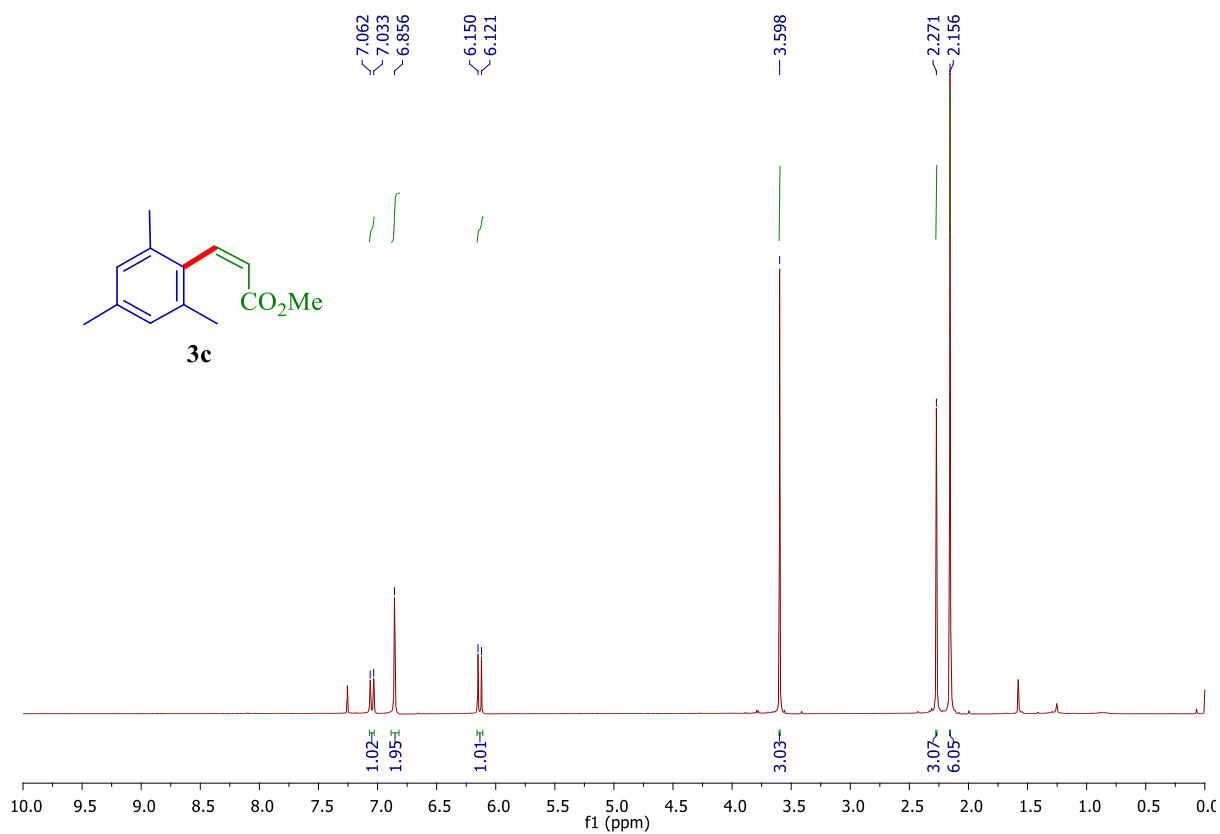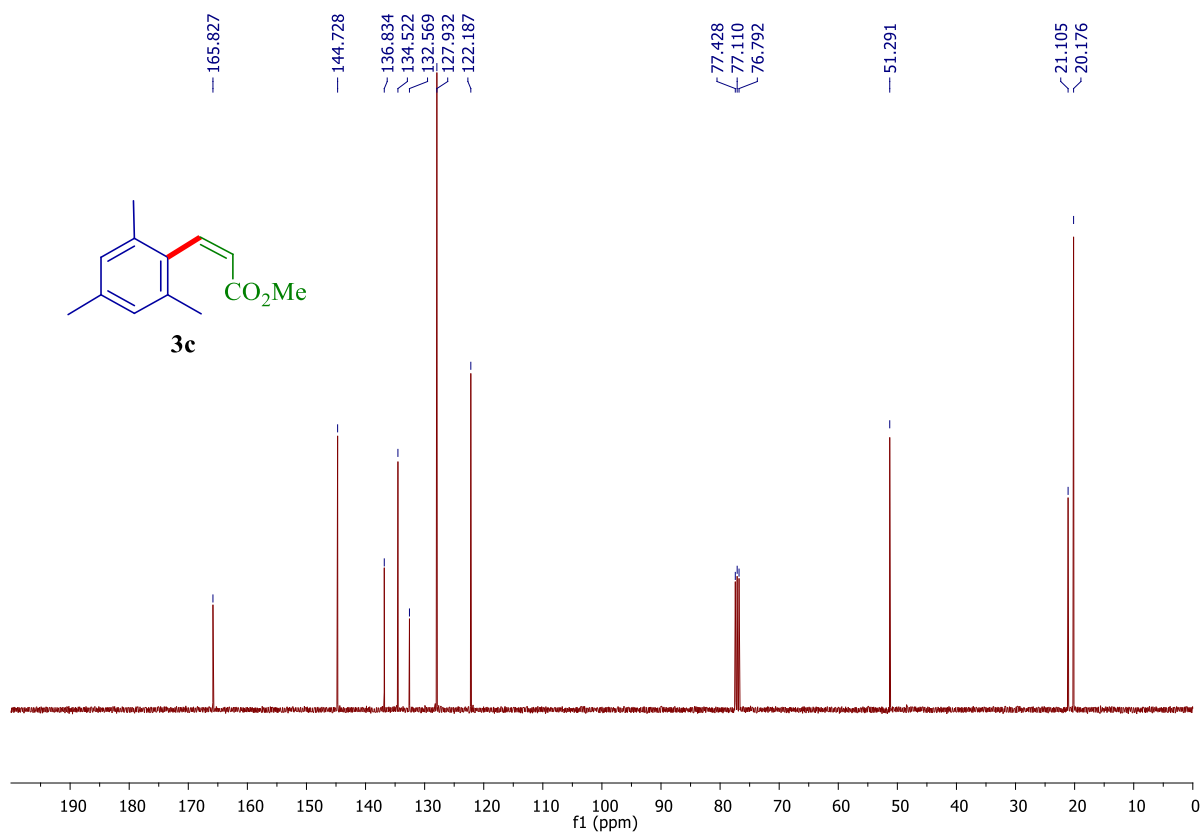



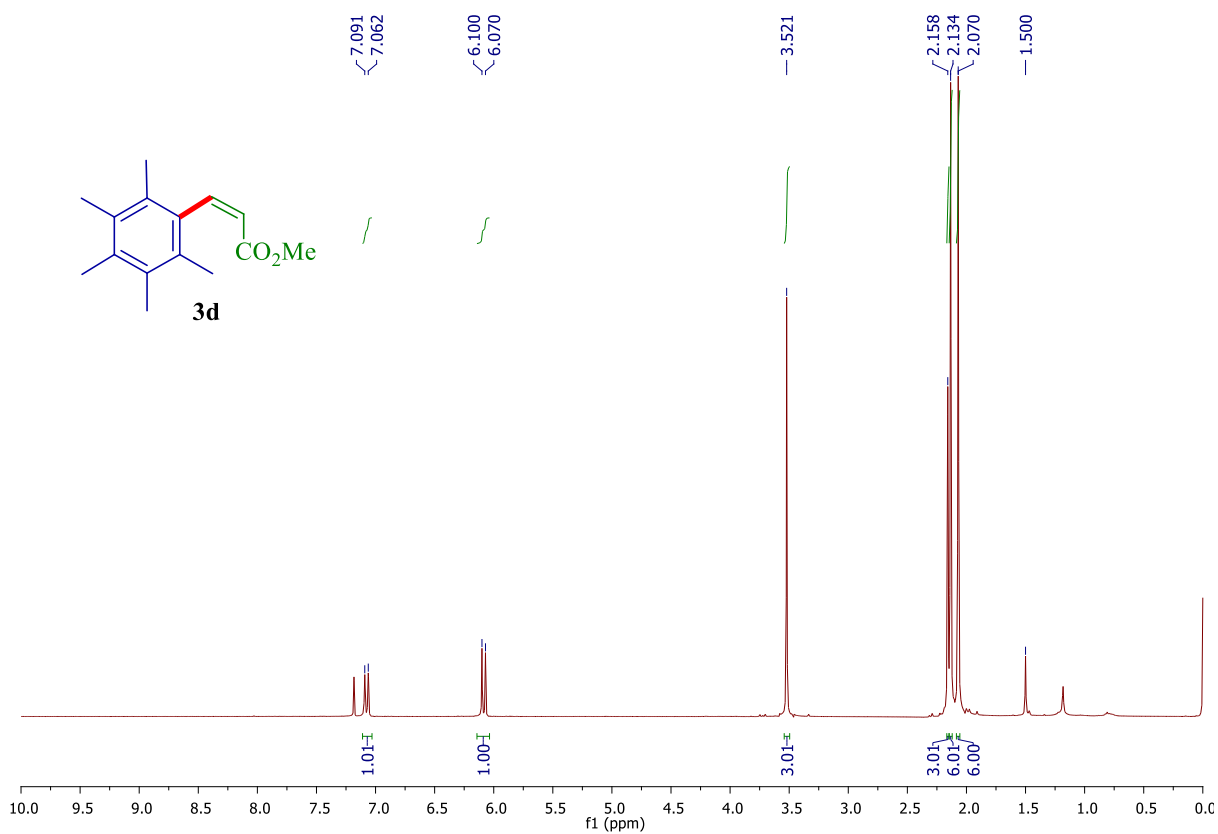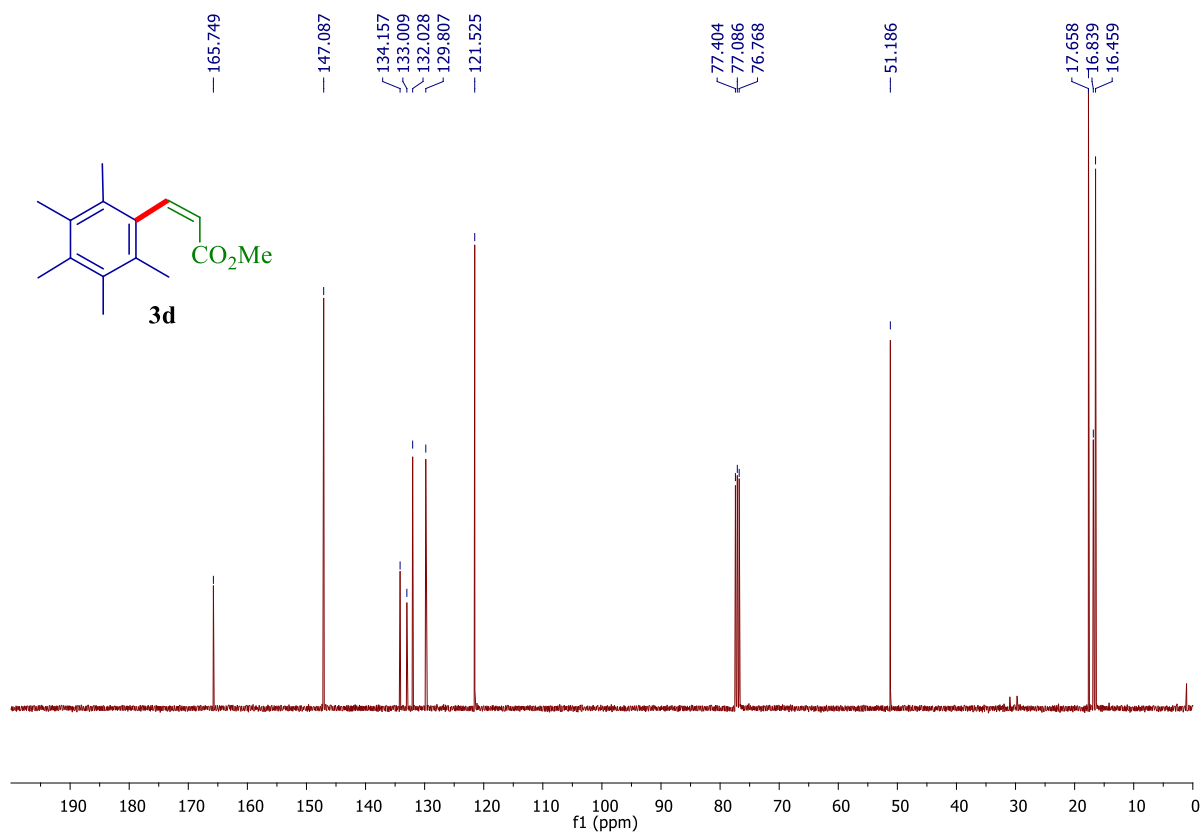

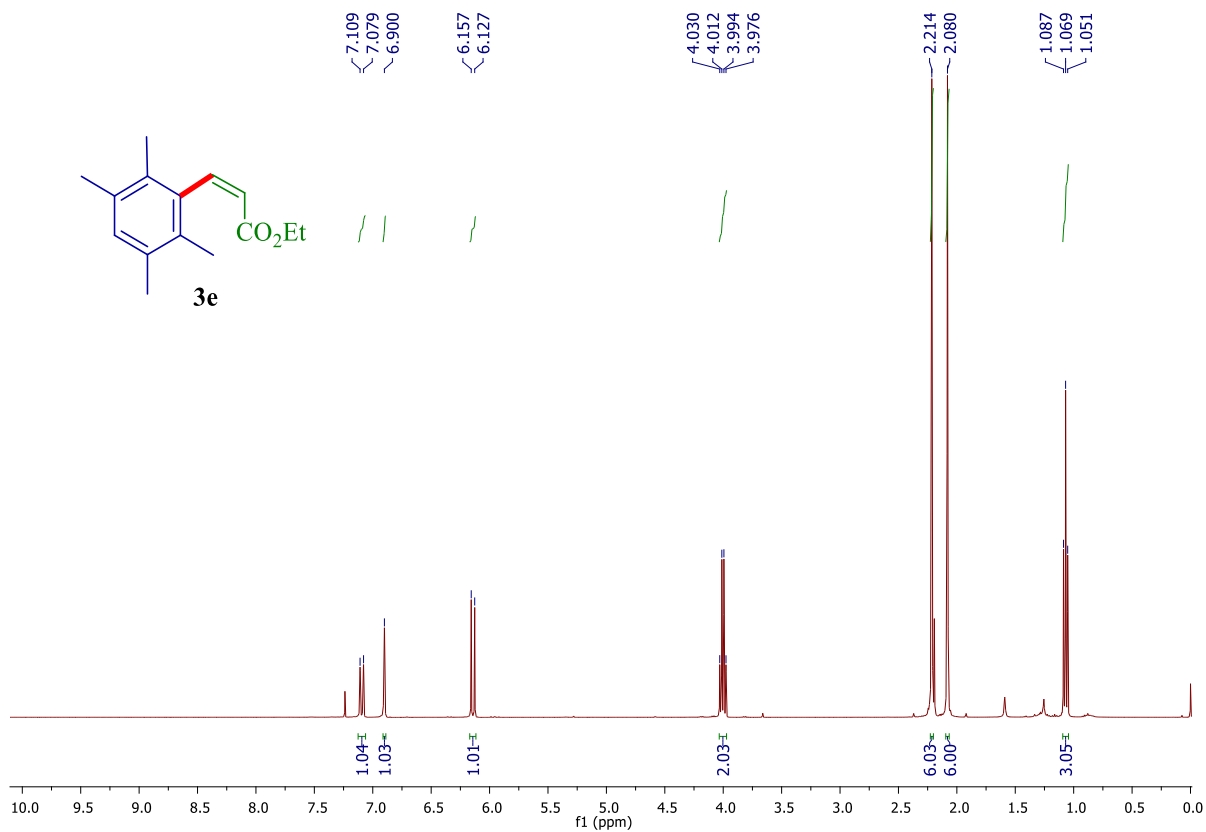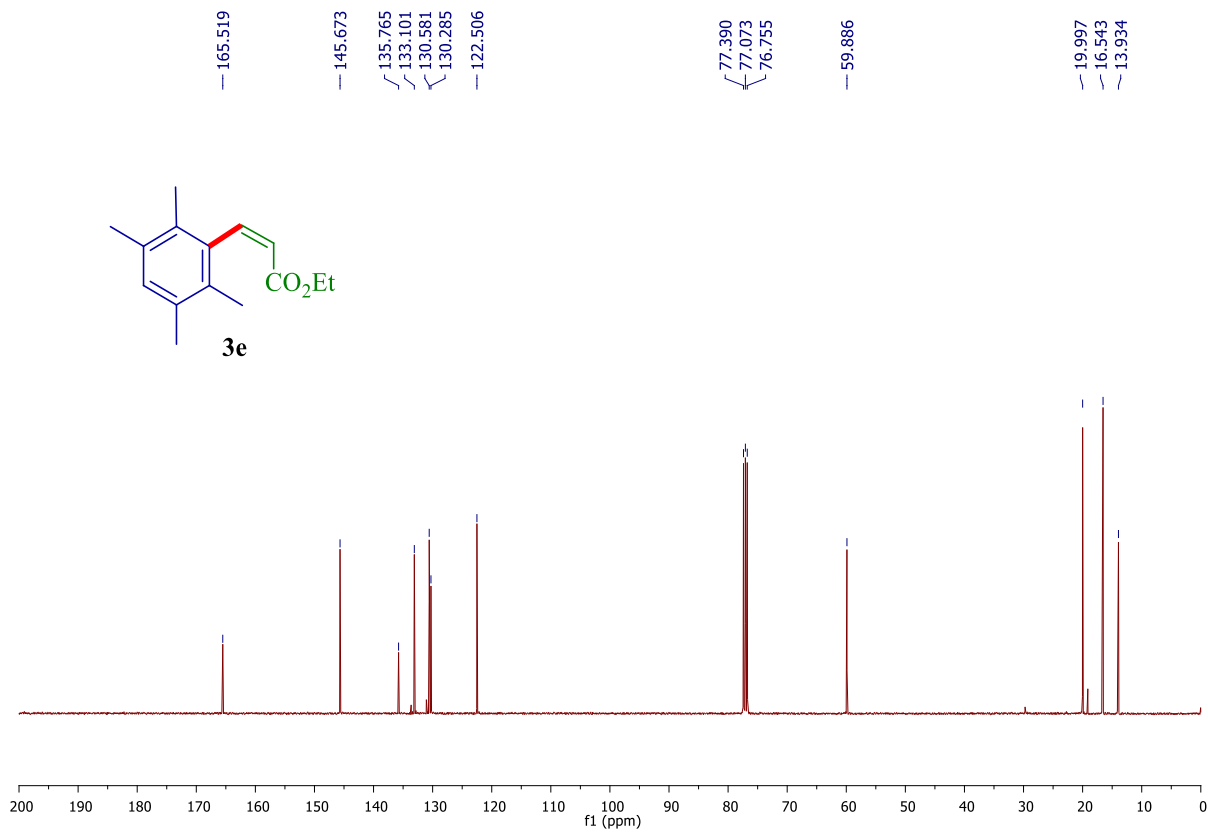

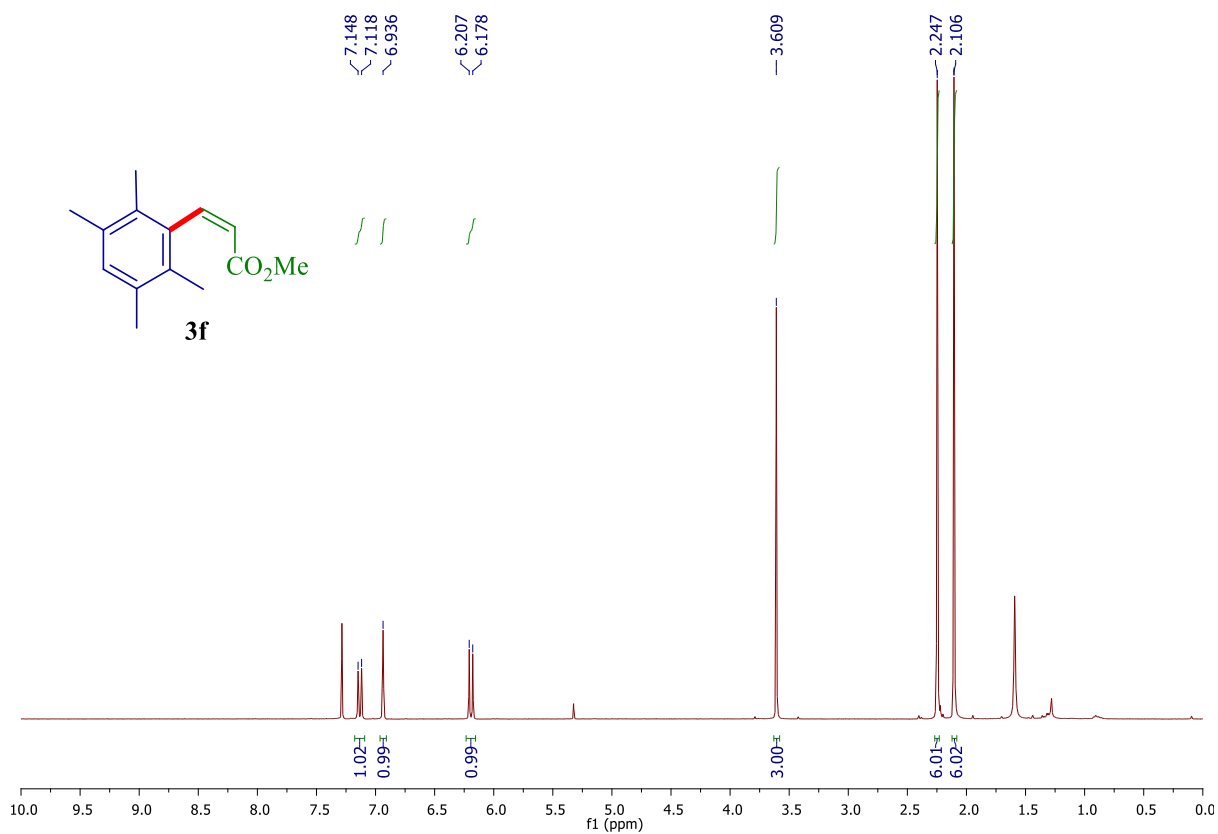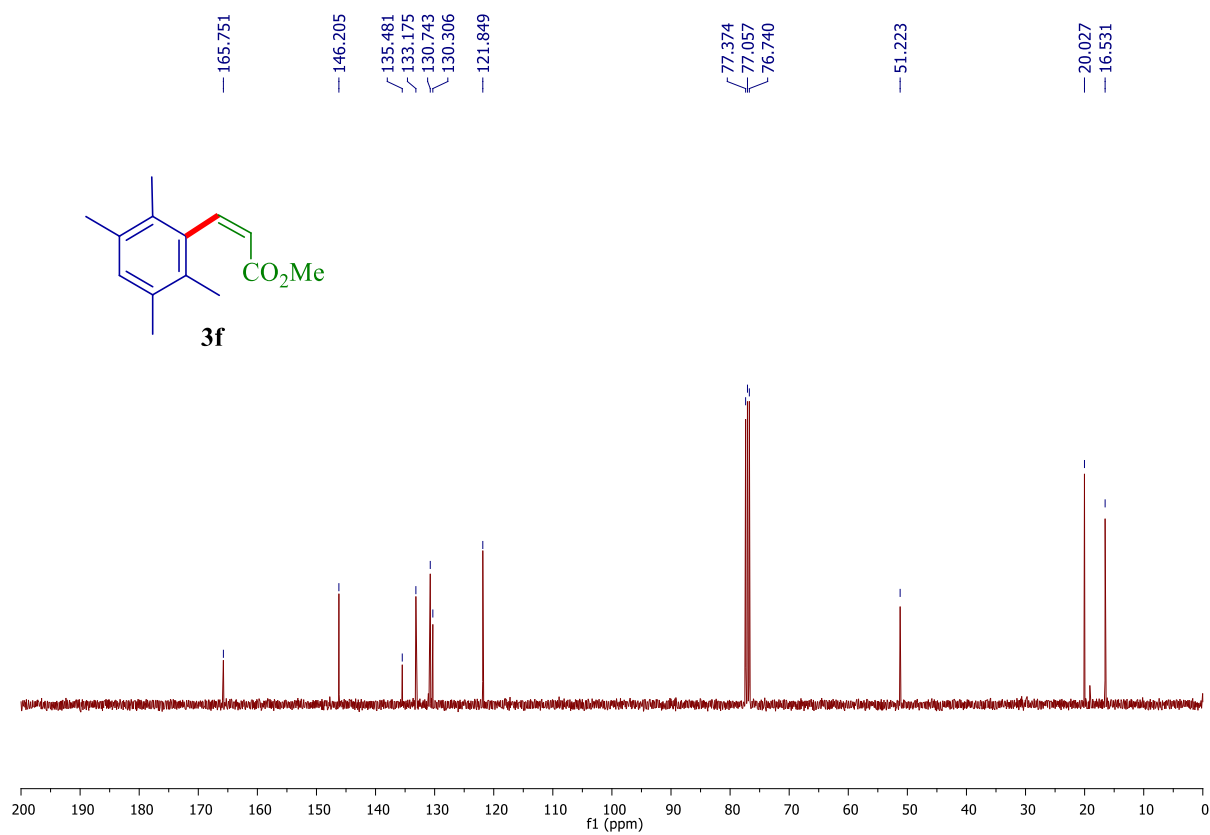

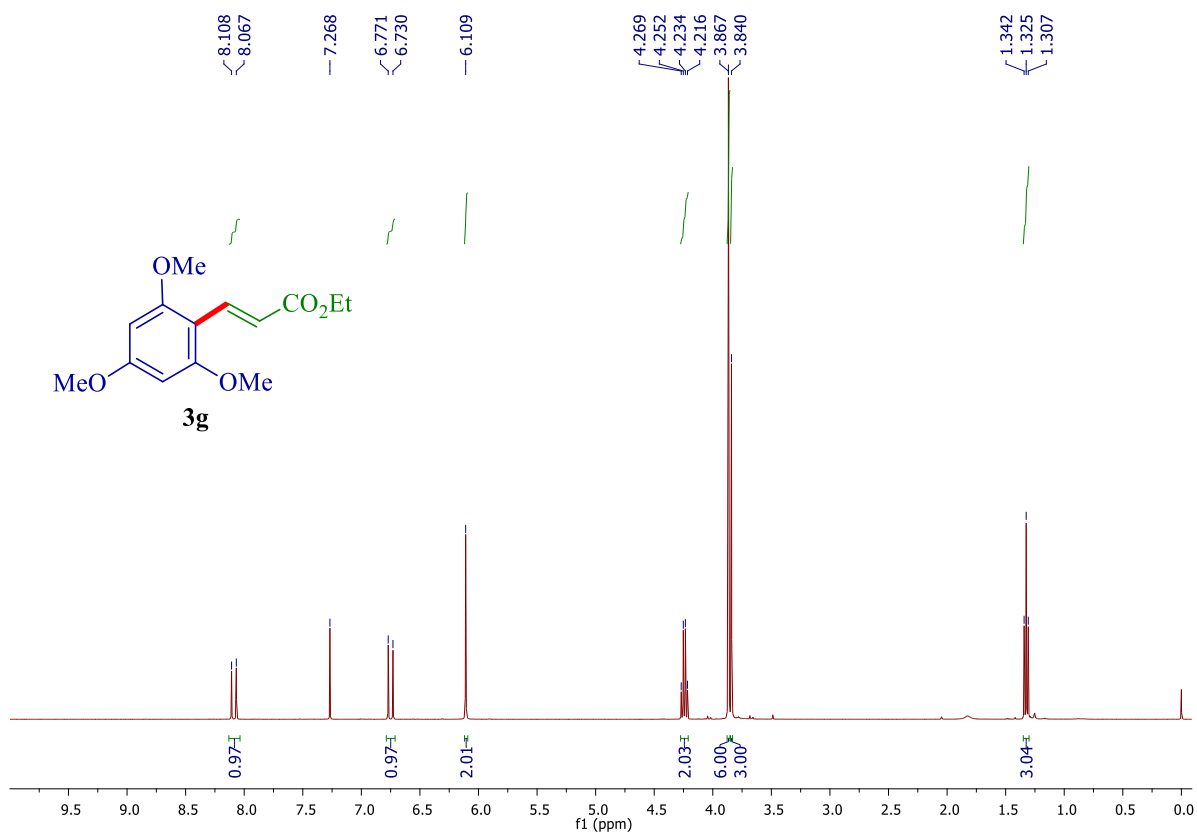

Figure S13.  $^1\text{H}$  NMR Spectrum of **3g** in  $\text{CDCl}_3$ .

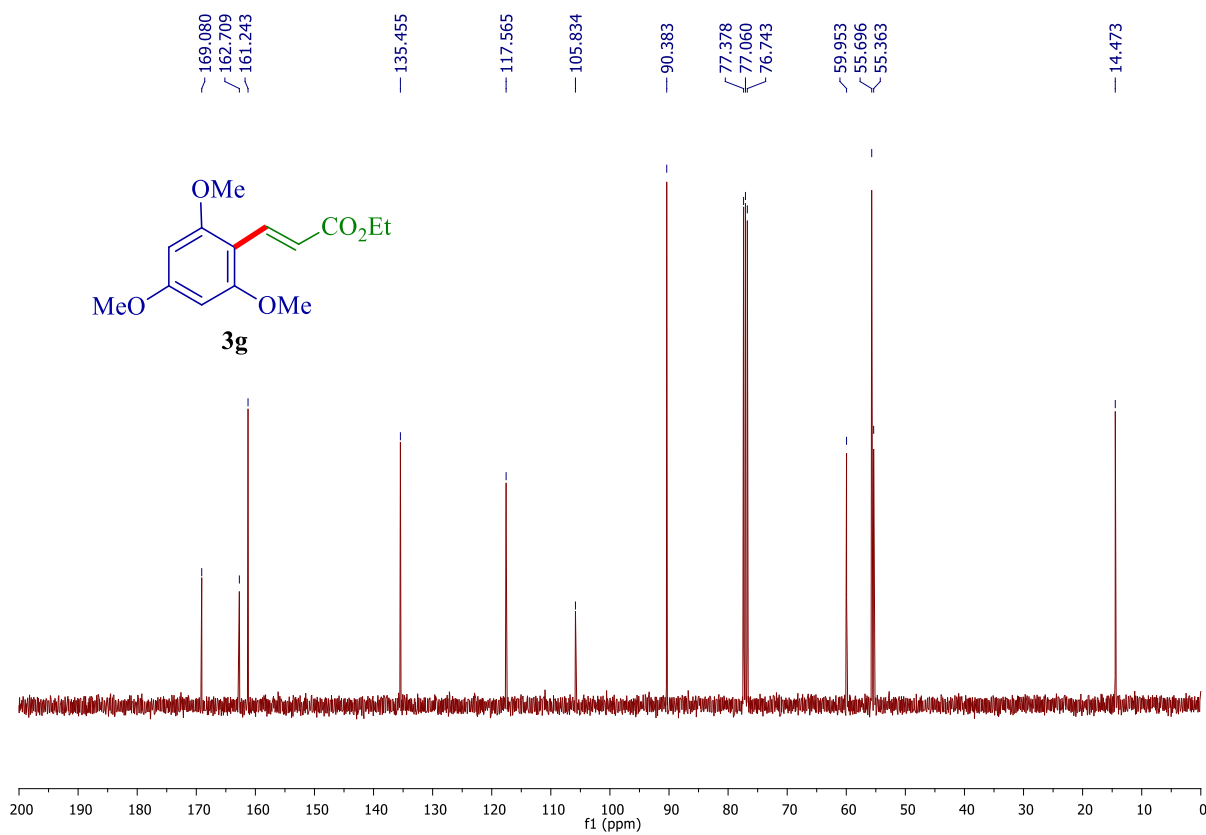

Figure S14.  $^{13}\text{C}$  NMR Spectrum of **3g** in  $\text{CDCl}_3$ .

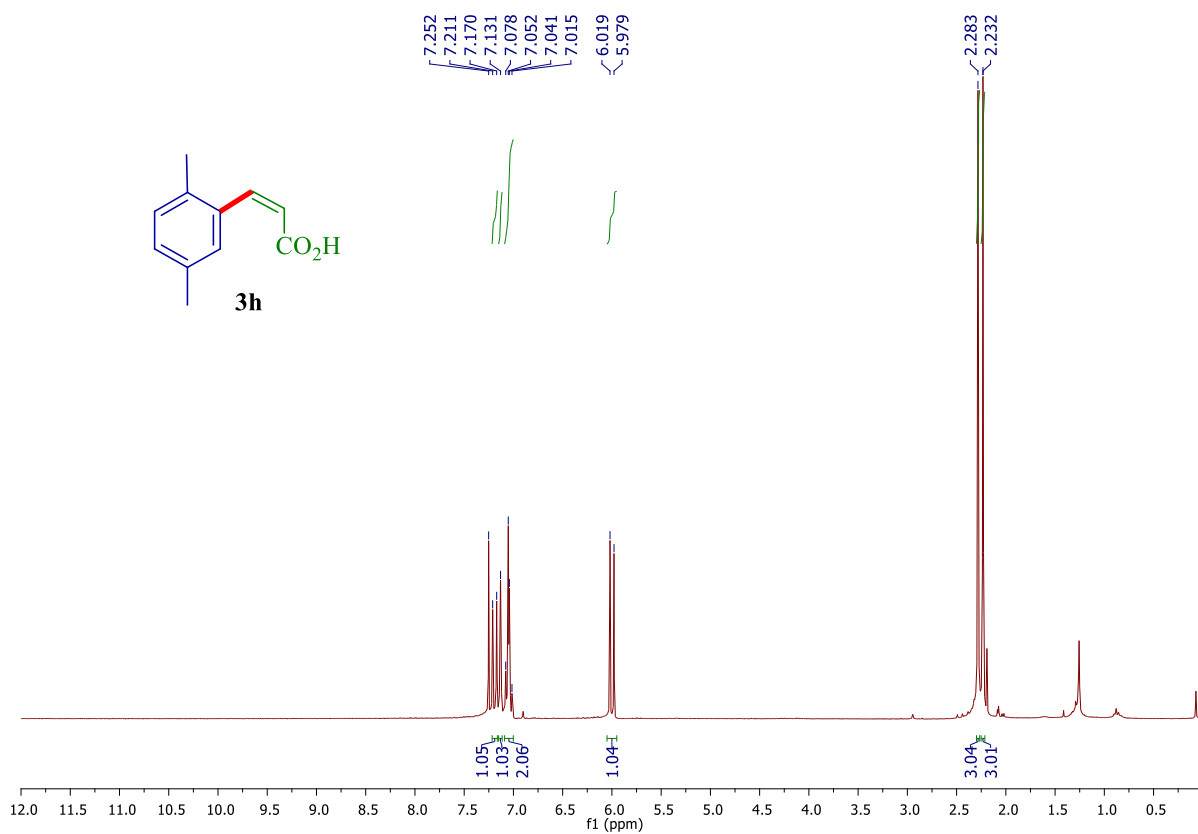

**Figure S15.**  $^1\text{H}$  NMR Spectrum of **3h** in  $\text{CDCl}_3$ .

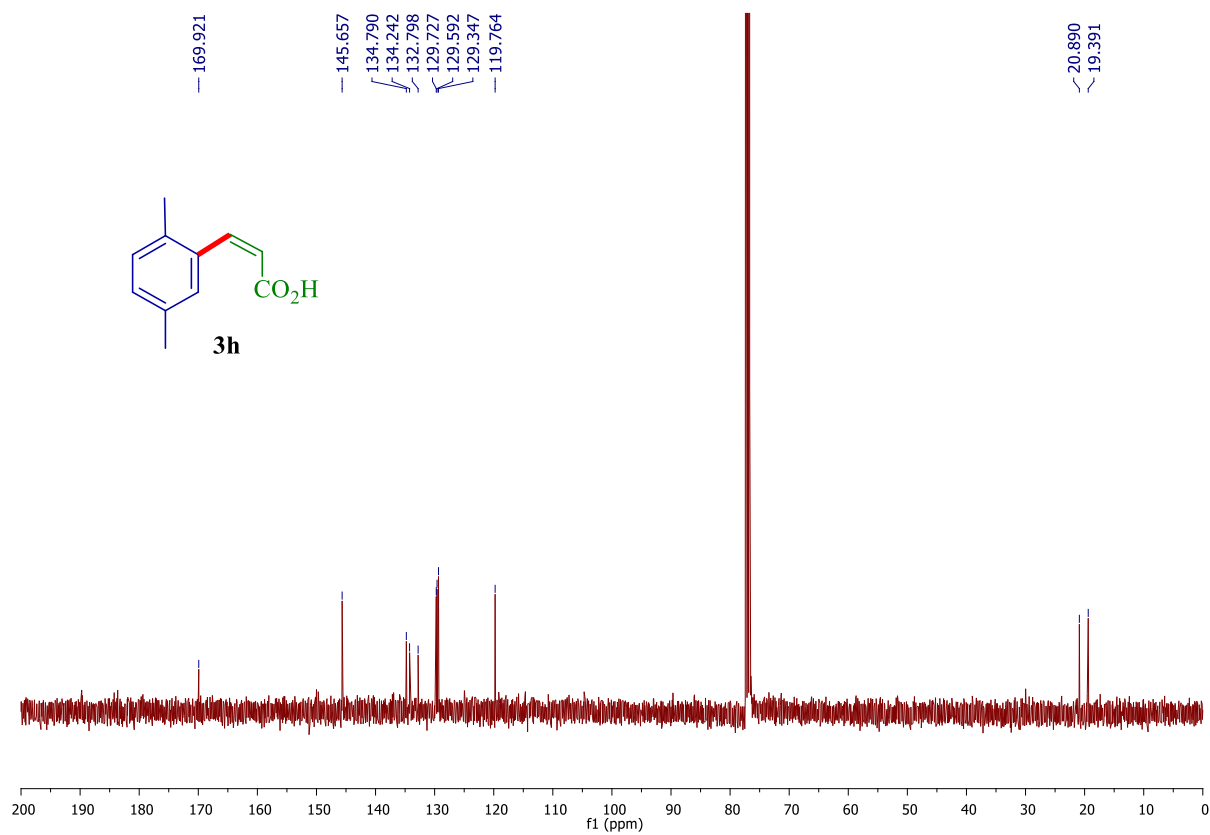

**Figure S16.**  $^{13}\text{C}$  NMR Spectrum of **3h** in  $\text{CDCl}_3$ .

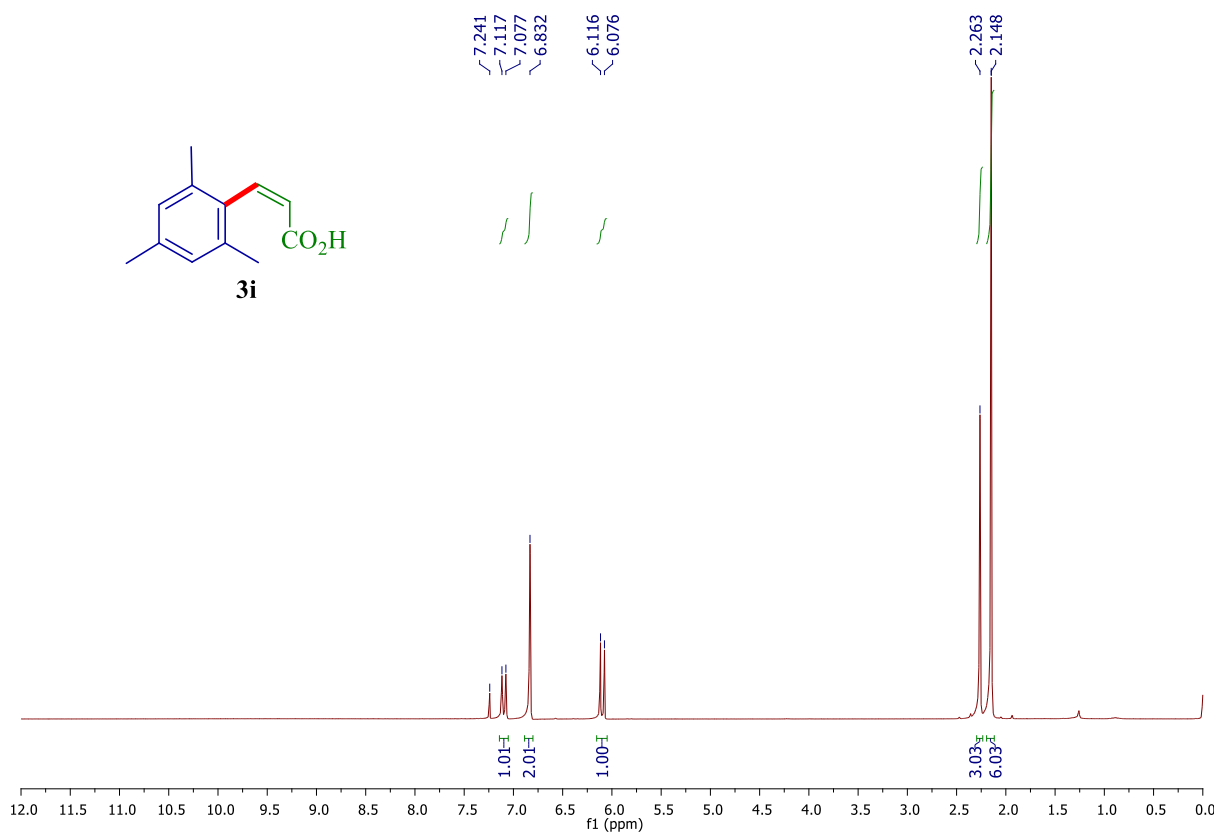

**Figure S17.** <sup>1</sup>H NMR Spectrum of **3i** in CDCl<sub>3</sub>.

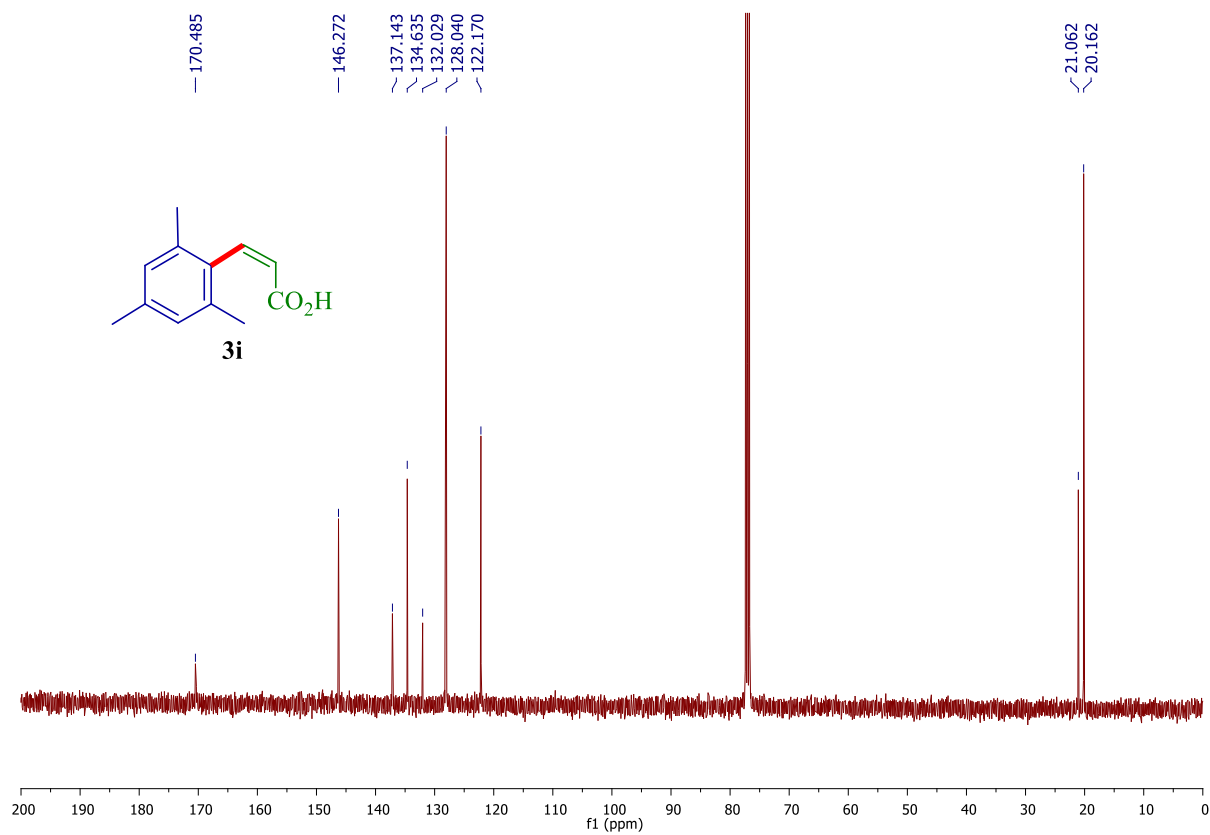

**Figure S18.** <sup>13</sup>C NMR Spectrum of **3i** in CDCl<sub>3</sub>.

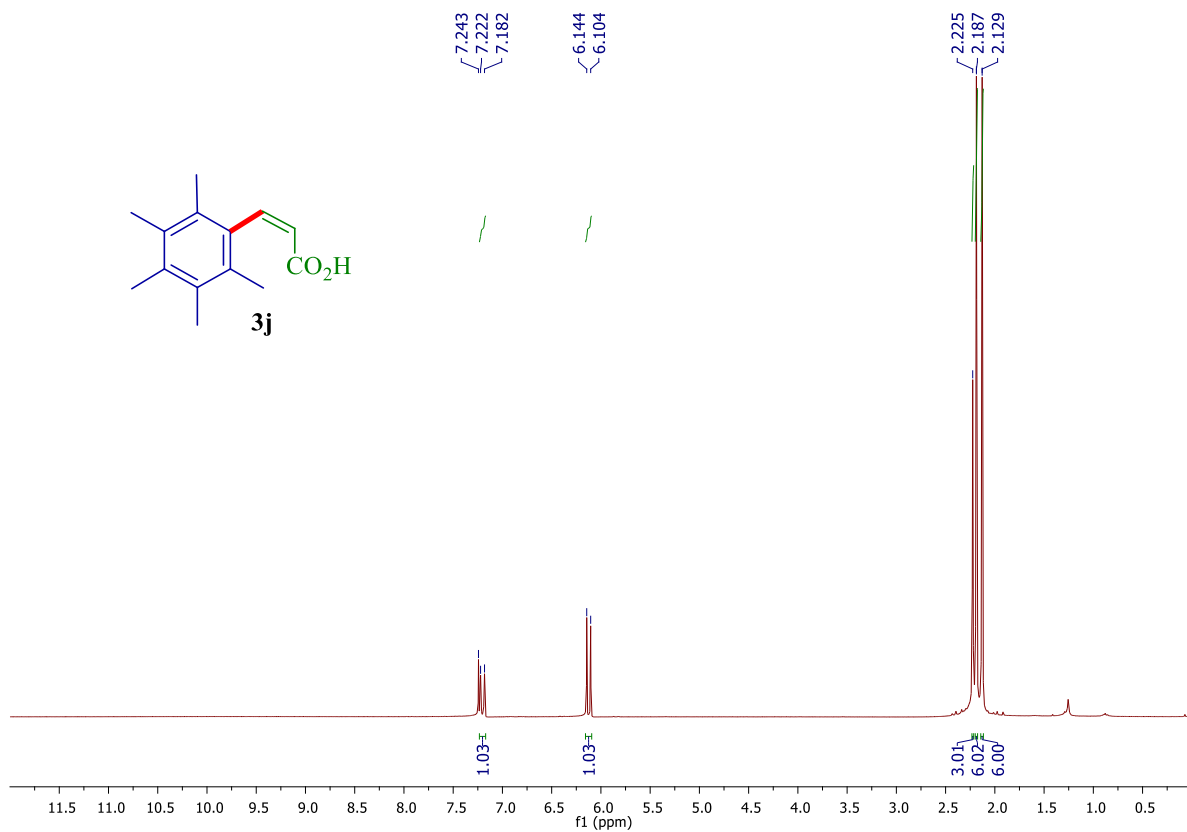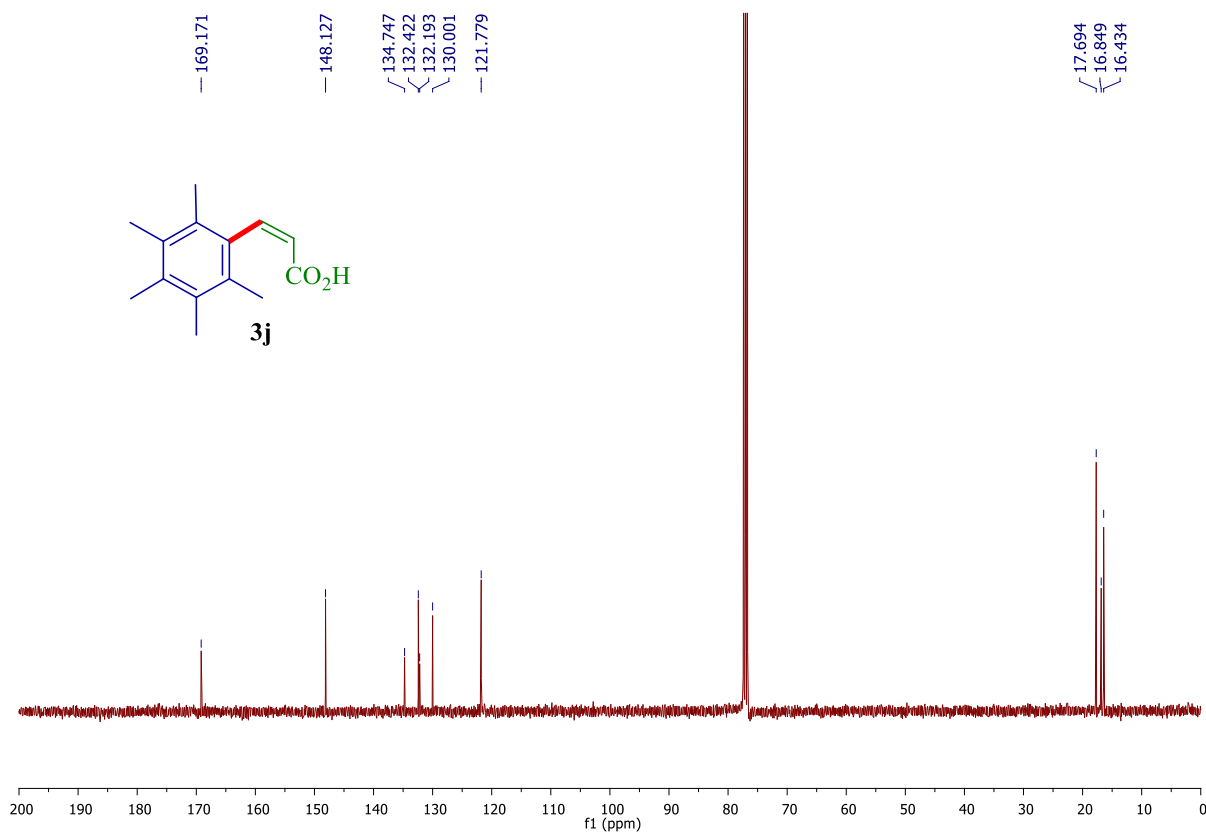

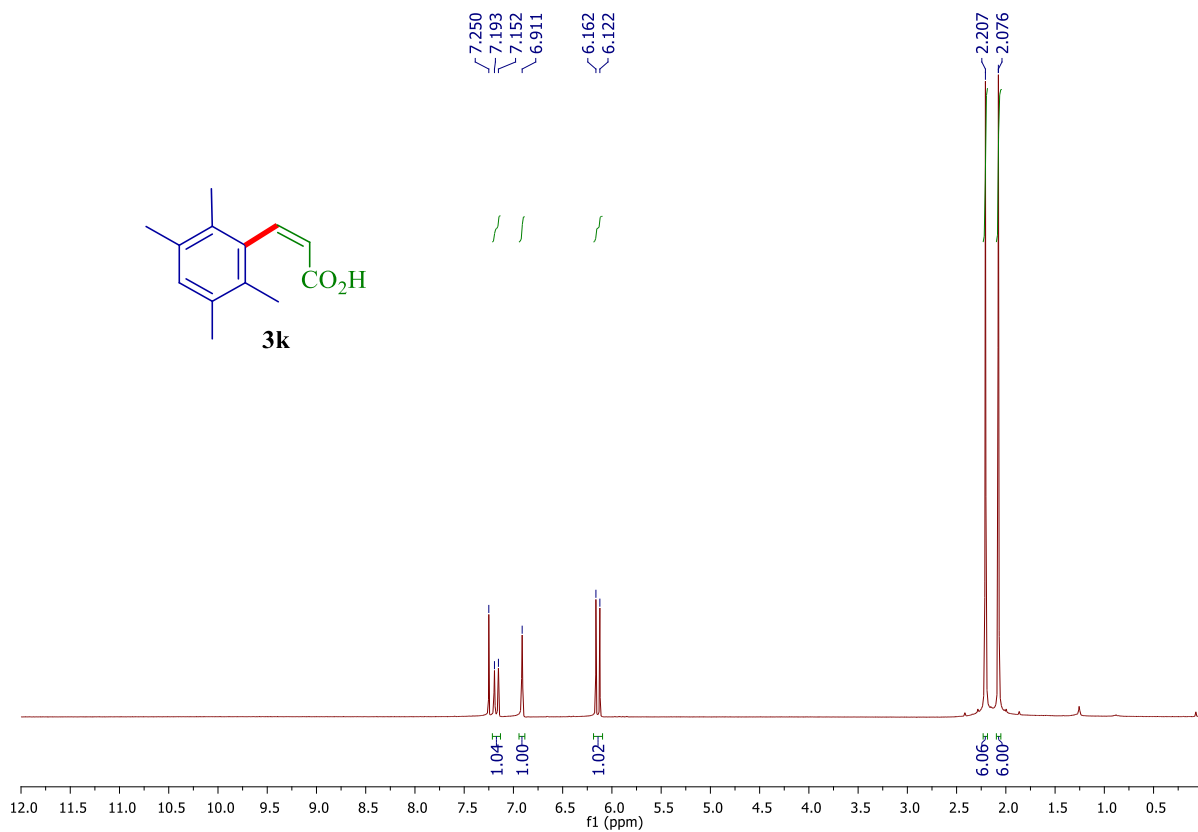

Figure S21.  $^1\text{H}$  NMR Spectrum of **3k** in  $\text{CDCl}_3$ .

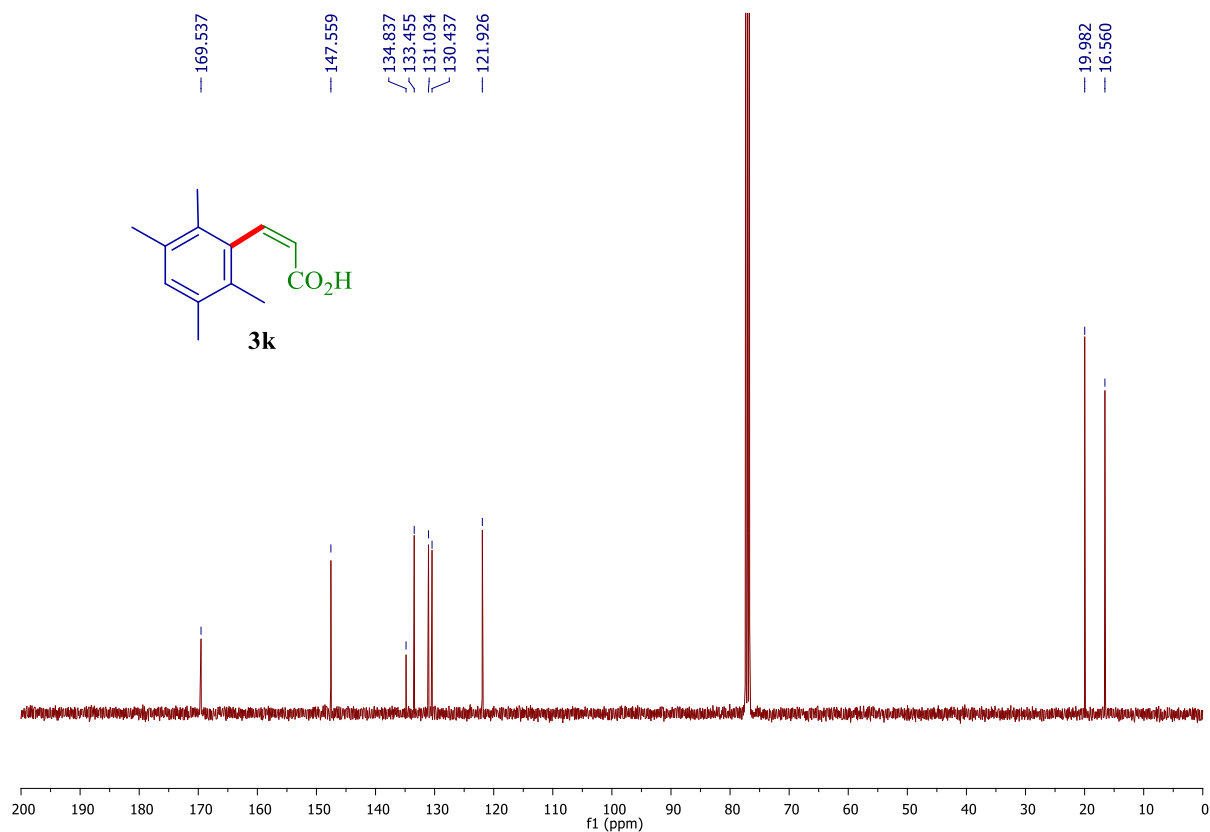

Figure S22.  $^{13}\text{C}$  NMR Spectrum of **3k** in  $\text{CDCl}_3$ .



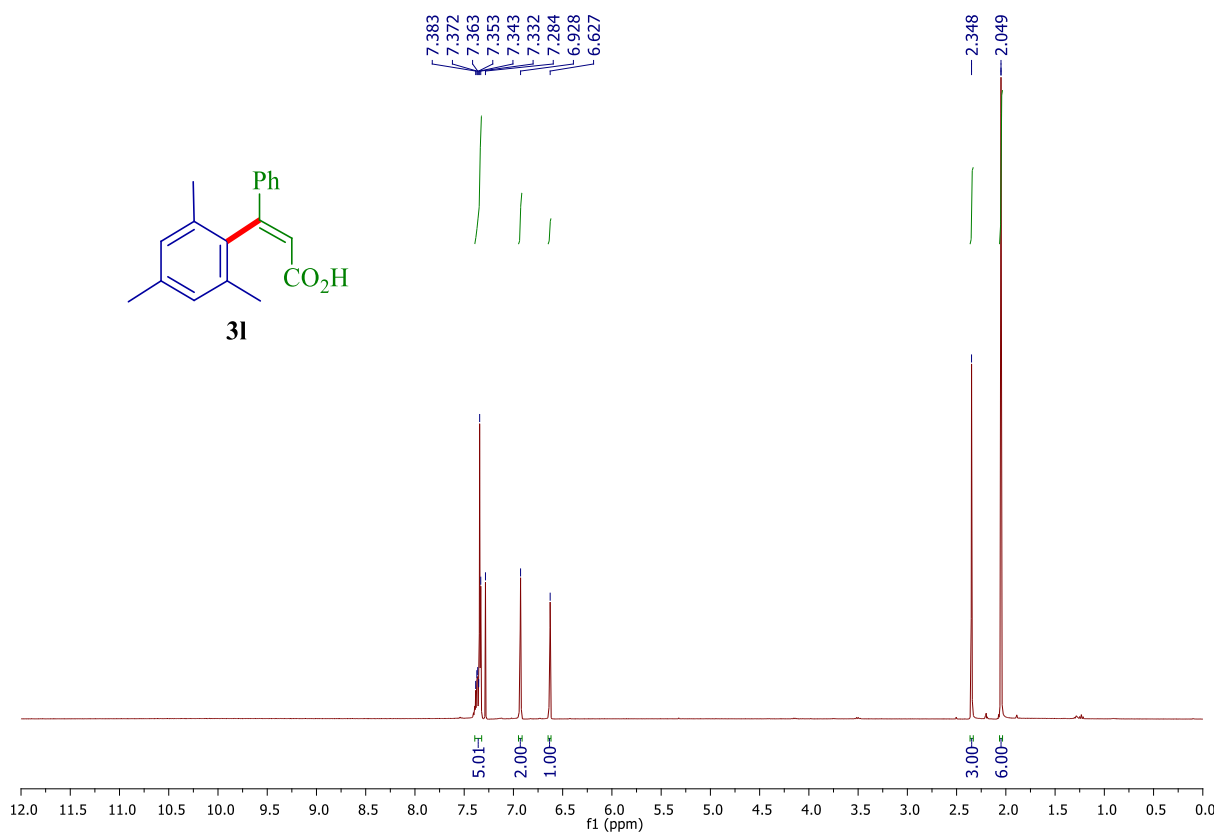

**Figure S23.** <sup>1</sup>H NMR Spectrum of **31** in CDCl<sub>3</sub>.

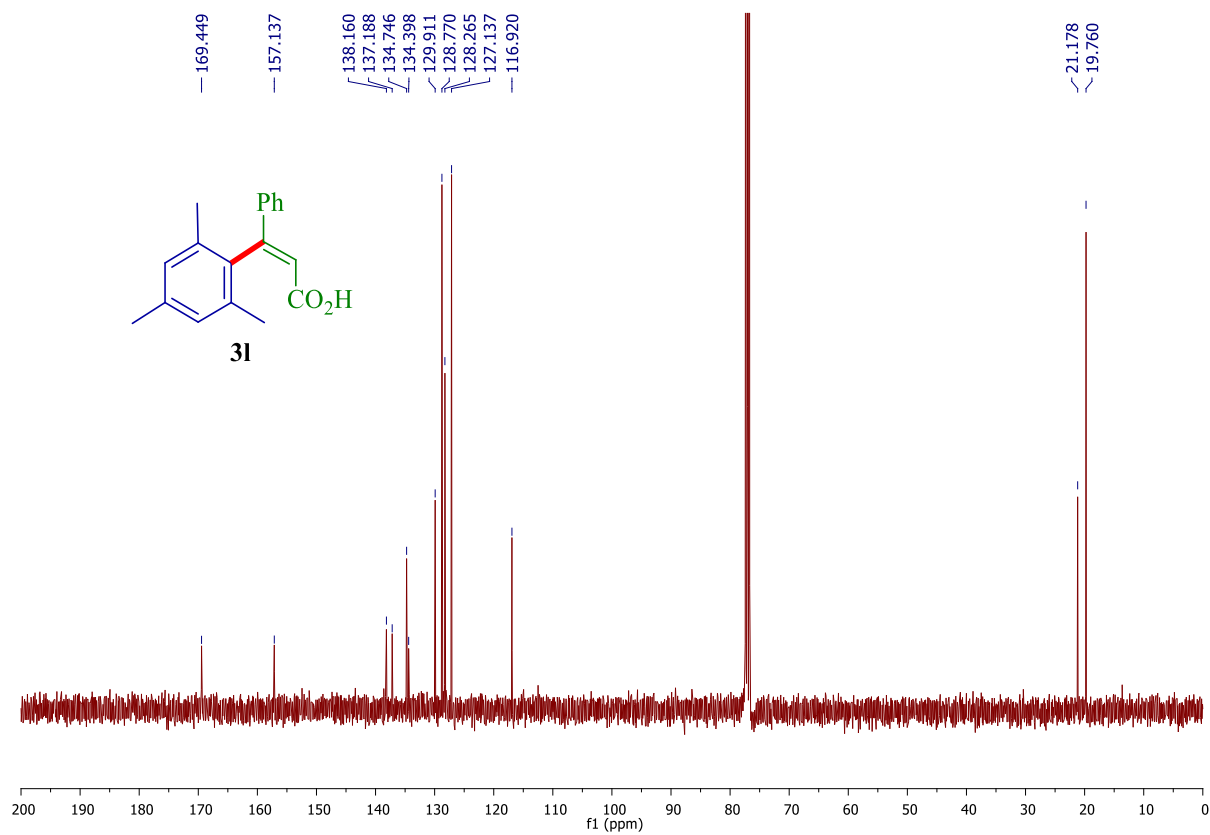

**Figure S24.** <sup>13</sup>C NMR Spectrum of **31** in CDCl<sub>3</sub>.

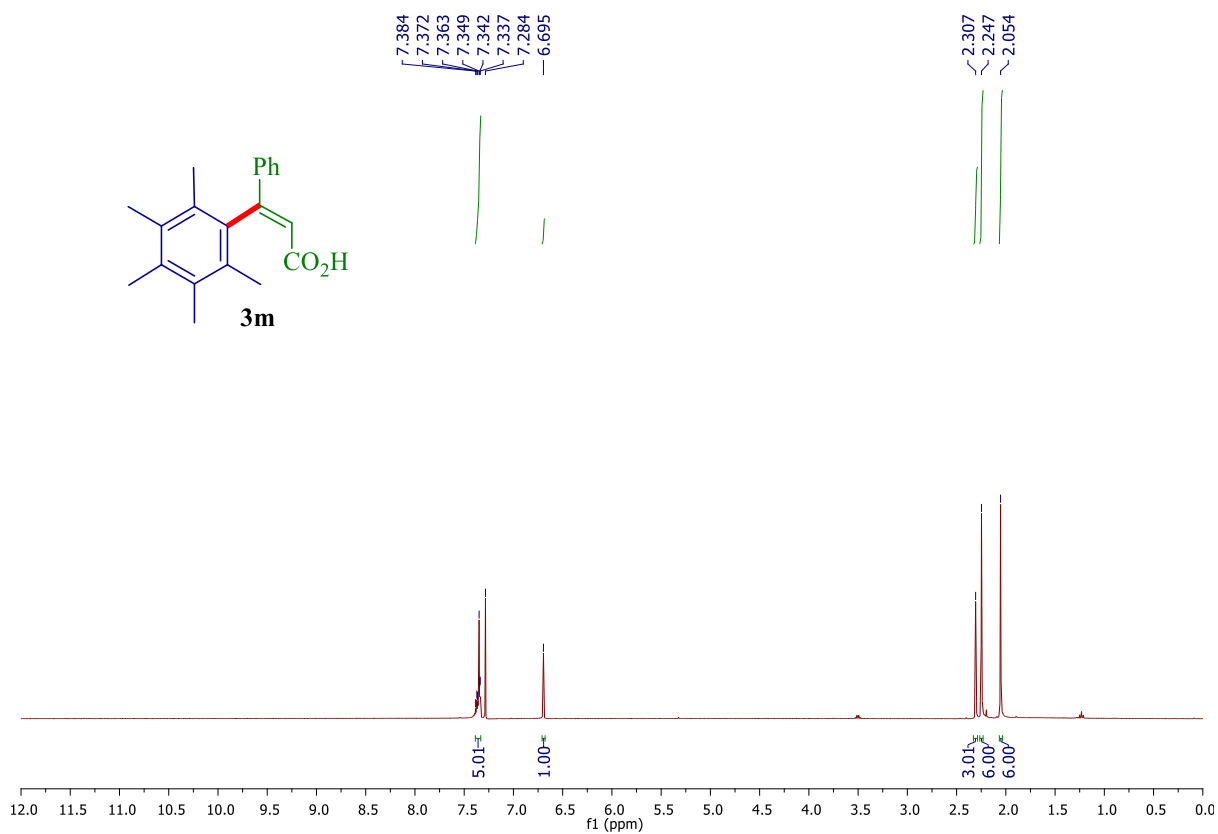

Figure S25. <sup>1</sup>H NMR Spectrum of **3m** in CDCl<sub>3</sub>.

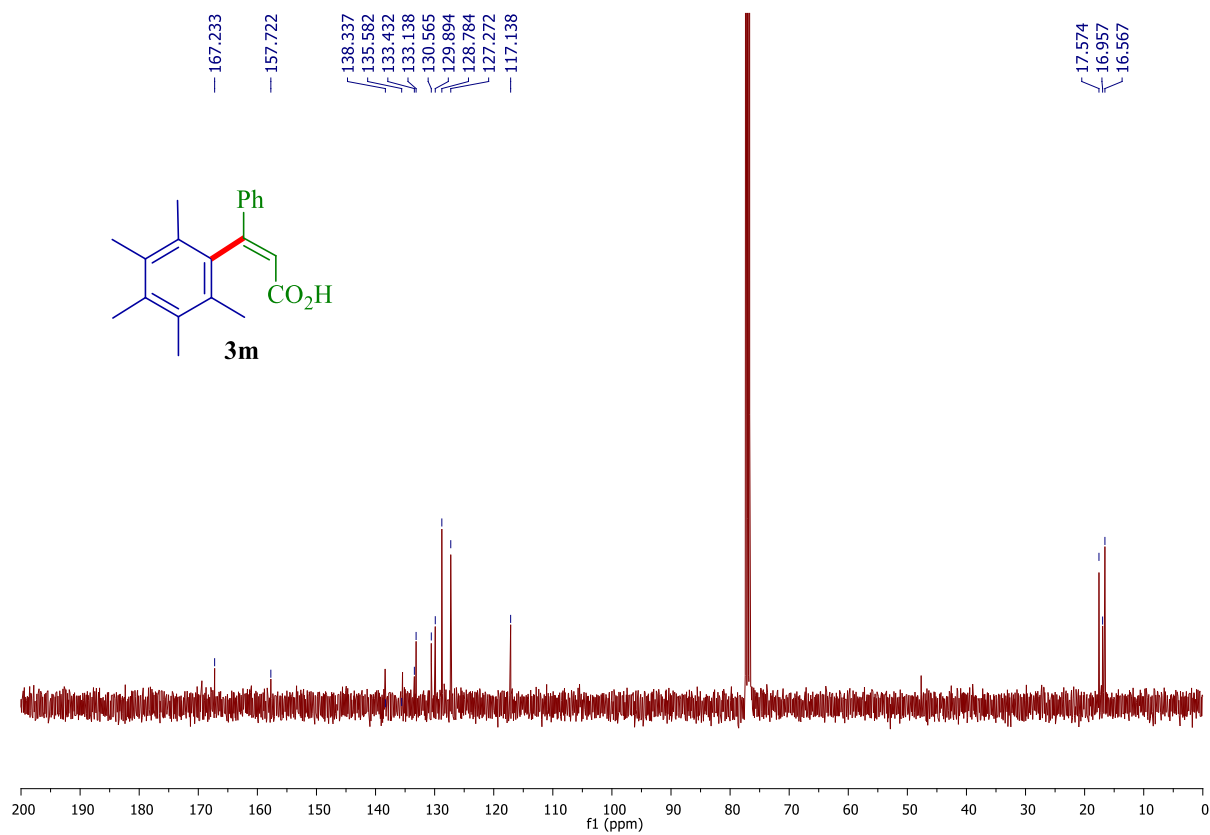

Figure S26. <sup>13</sup>C NMR Spectrum of **3m** in CDCl<sub>3</sub>.

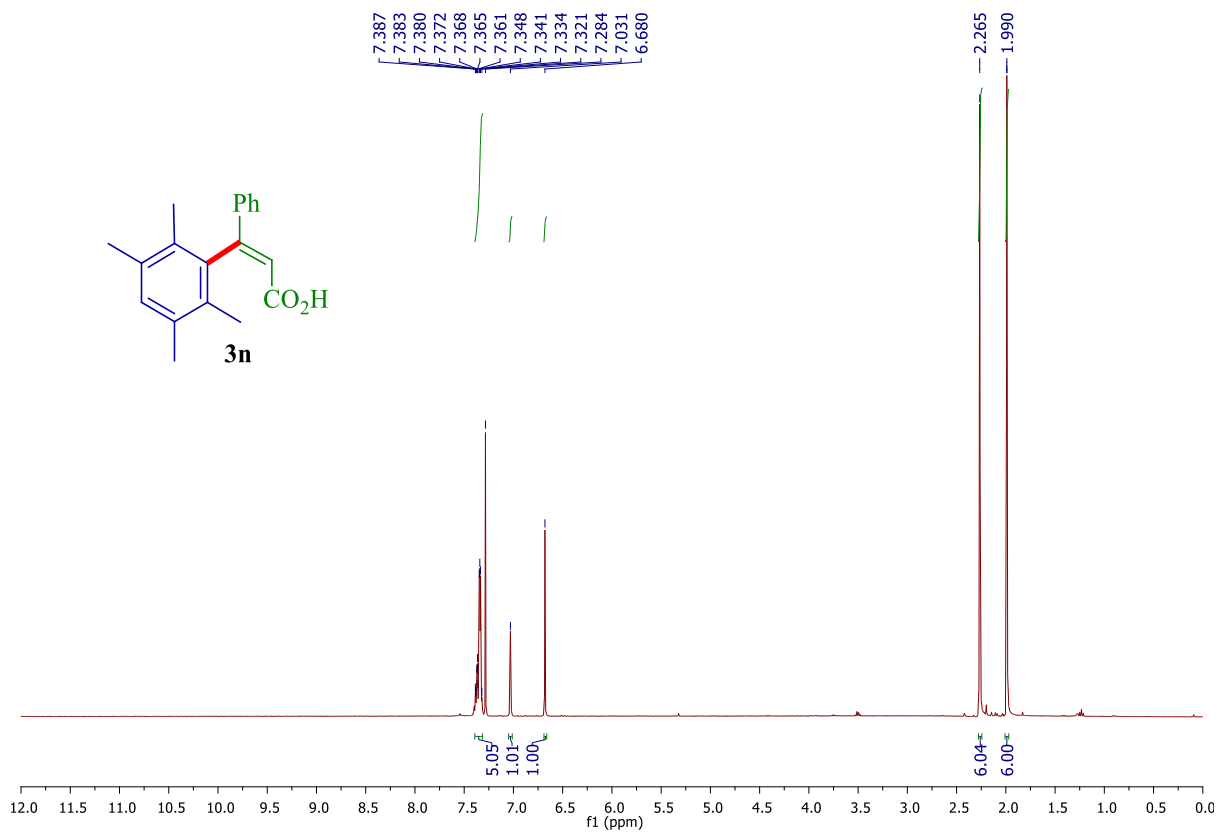

Figure S27. <sup>1</sup>H NMR Spectrum of **3n** in CDCl<sub>3</sub>.

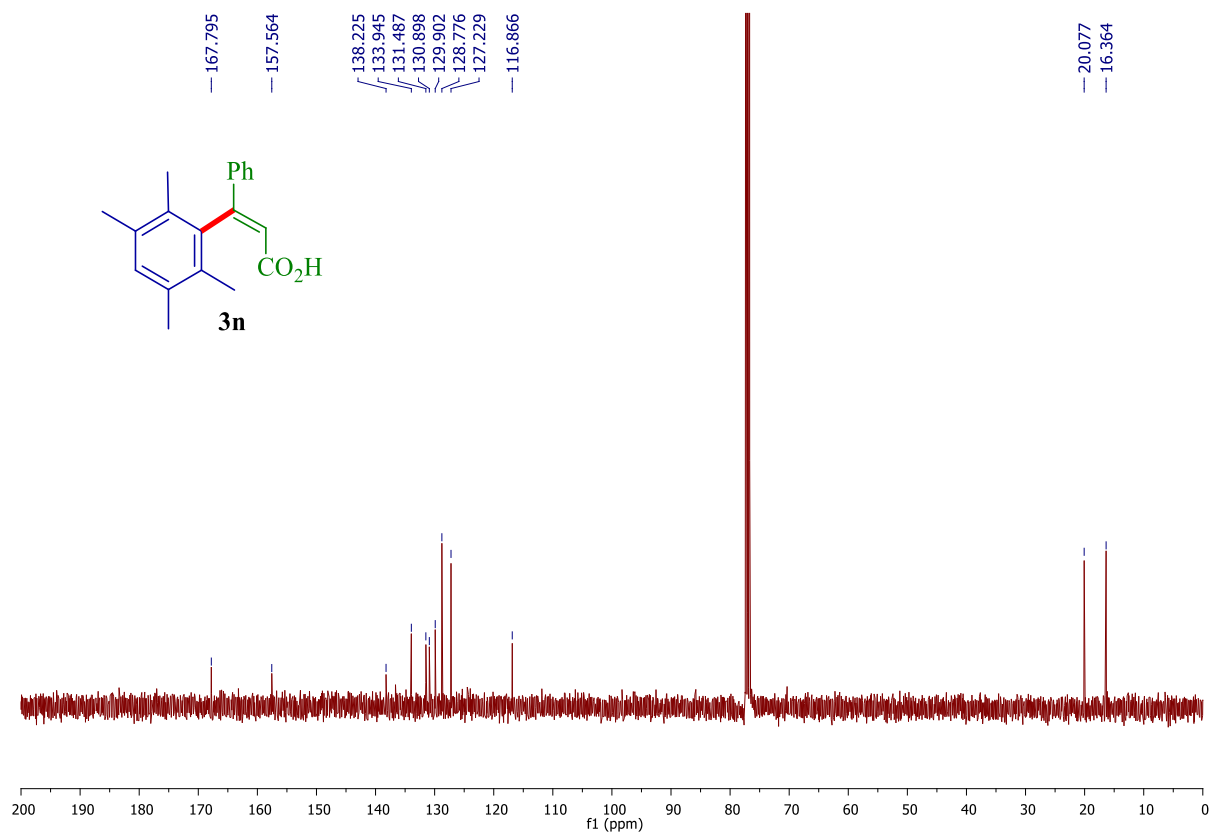

Figure S28. <sup>13</sup>C NMR Spectrum of **3n** in CDCl<sub>3</sub>.

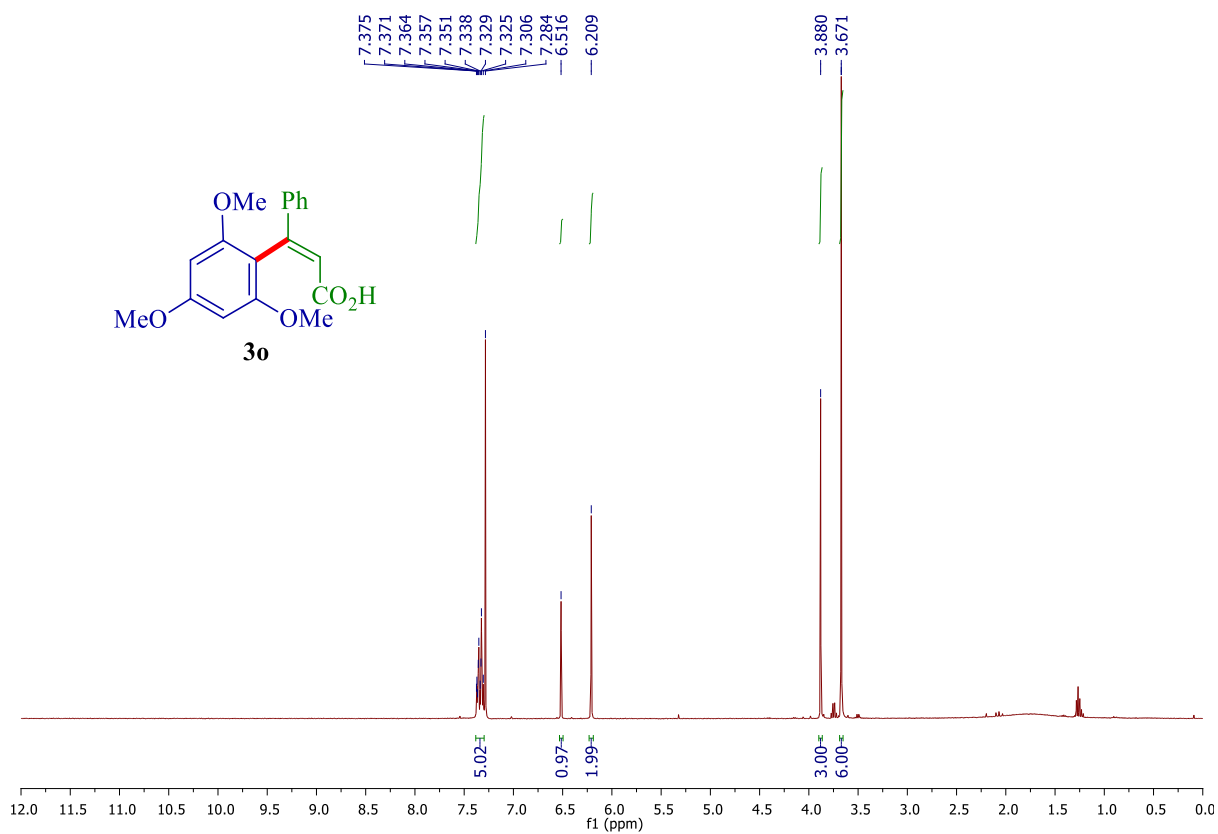

Figure S29. <sup>1</sup>H NMR Spectrum of **3o** in CDCl<sub>3</sub>.

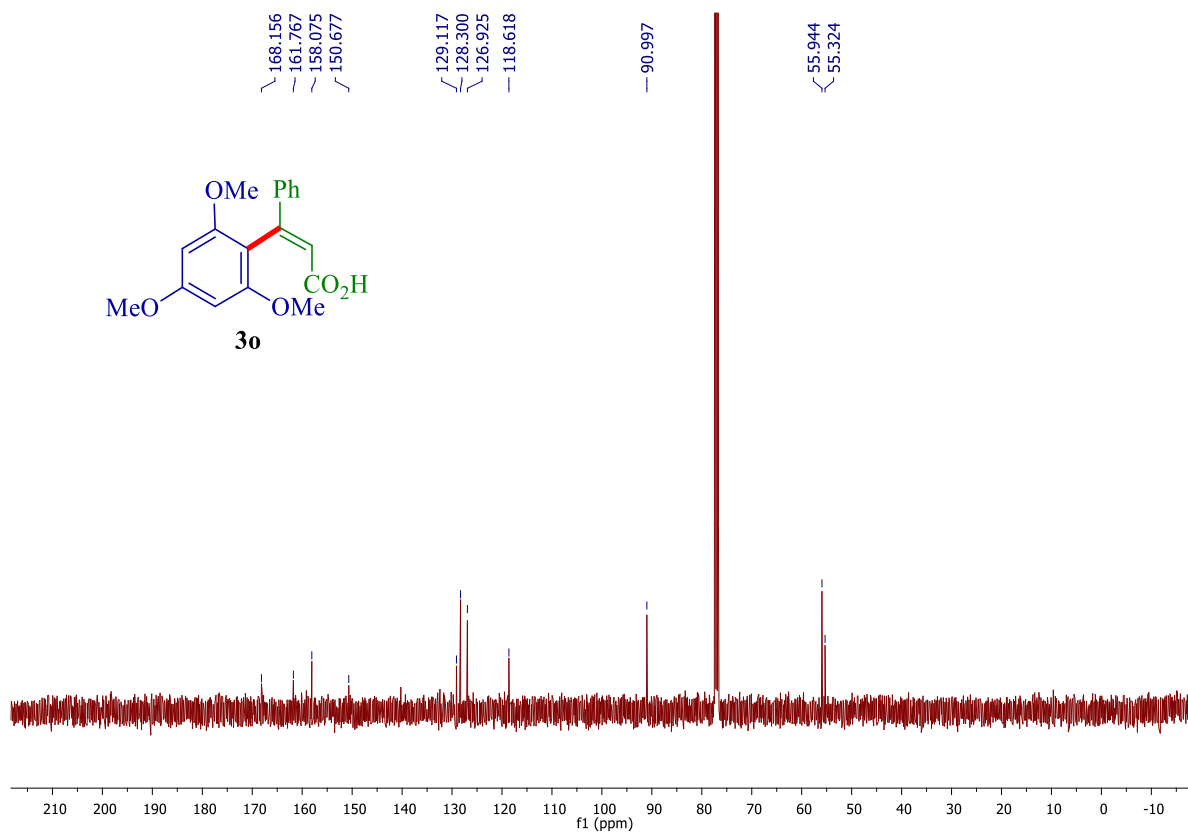

Figure S30. <sup>13</sup>C NMR Spectrum of **3o** in CDCl<sub>3</sub>.

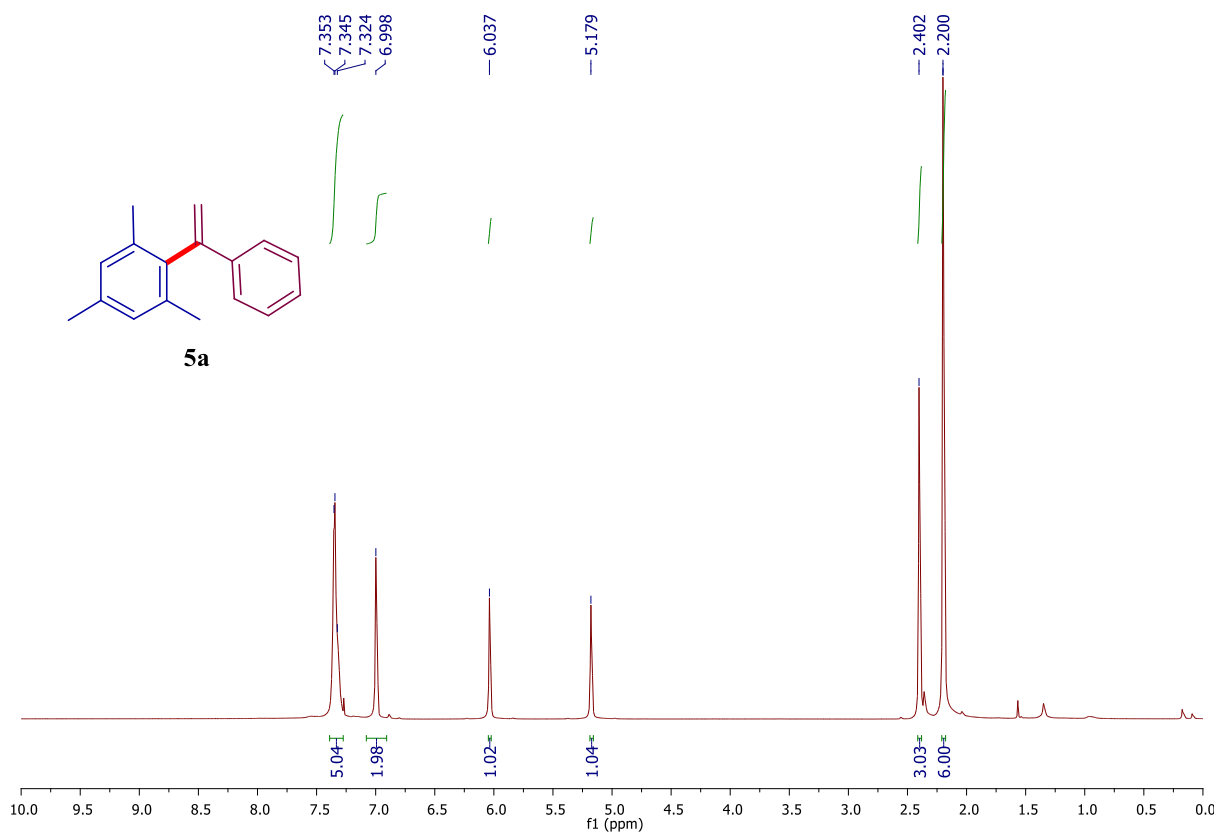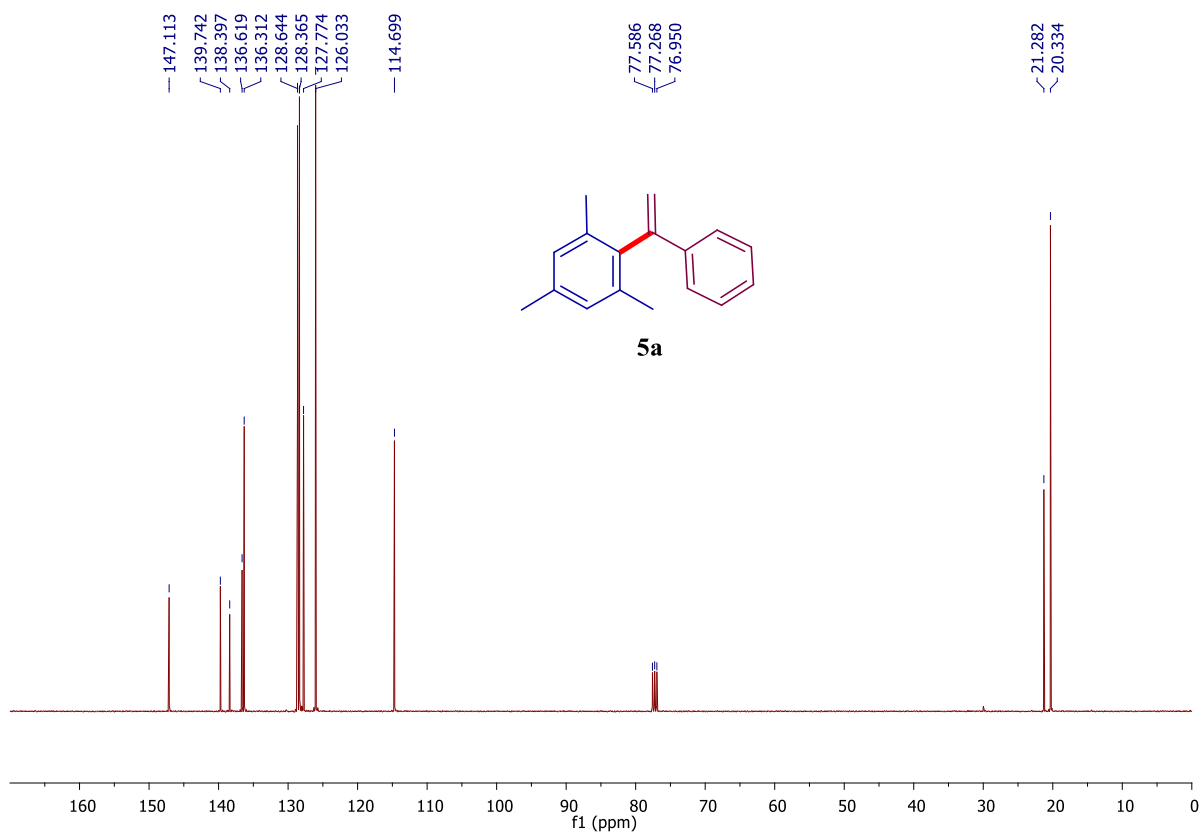

**Figure S32.  $^{13}\text{C}$  NMR Spectrum of **5a** in  $\text{CDCl}_3$ .**

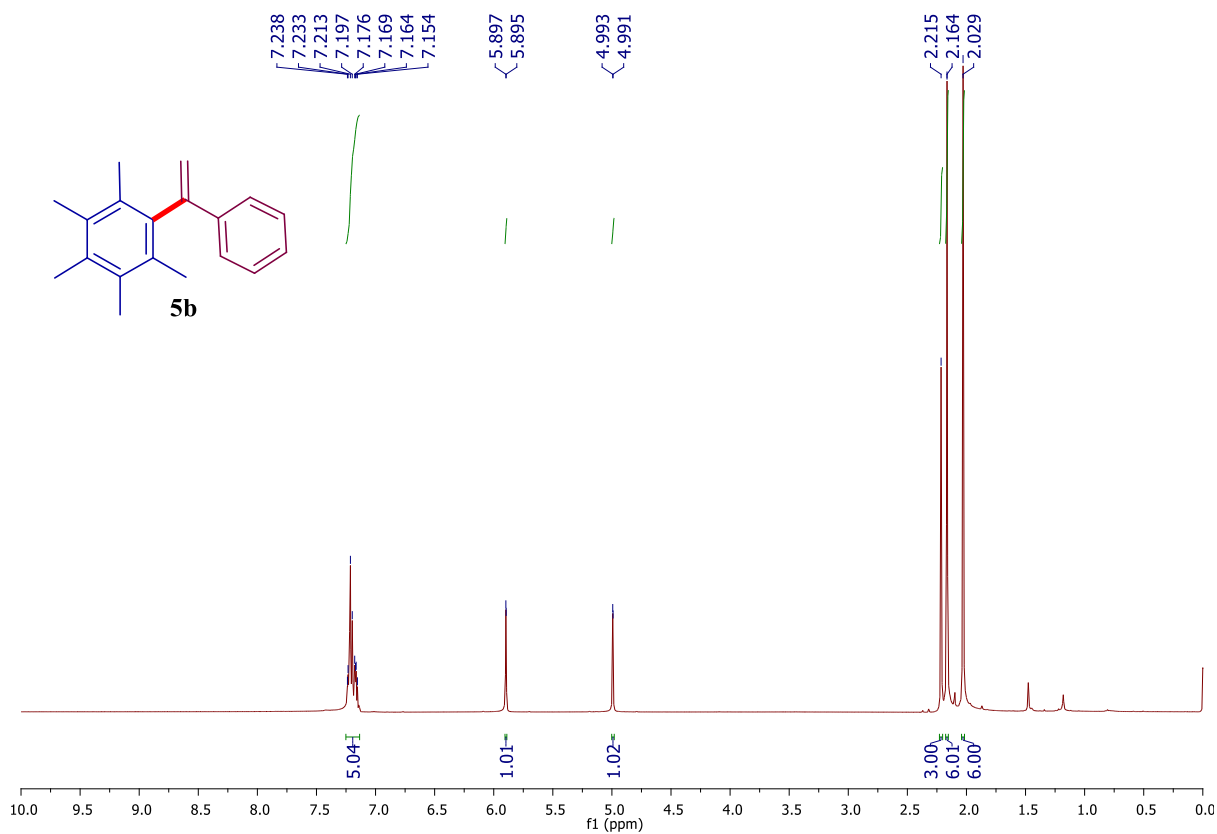

**Figure S33.** <sup>1</sup>H NMR Spectrum of **5b** in CDCl<sub>3</sub>.

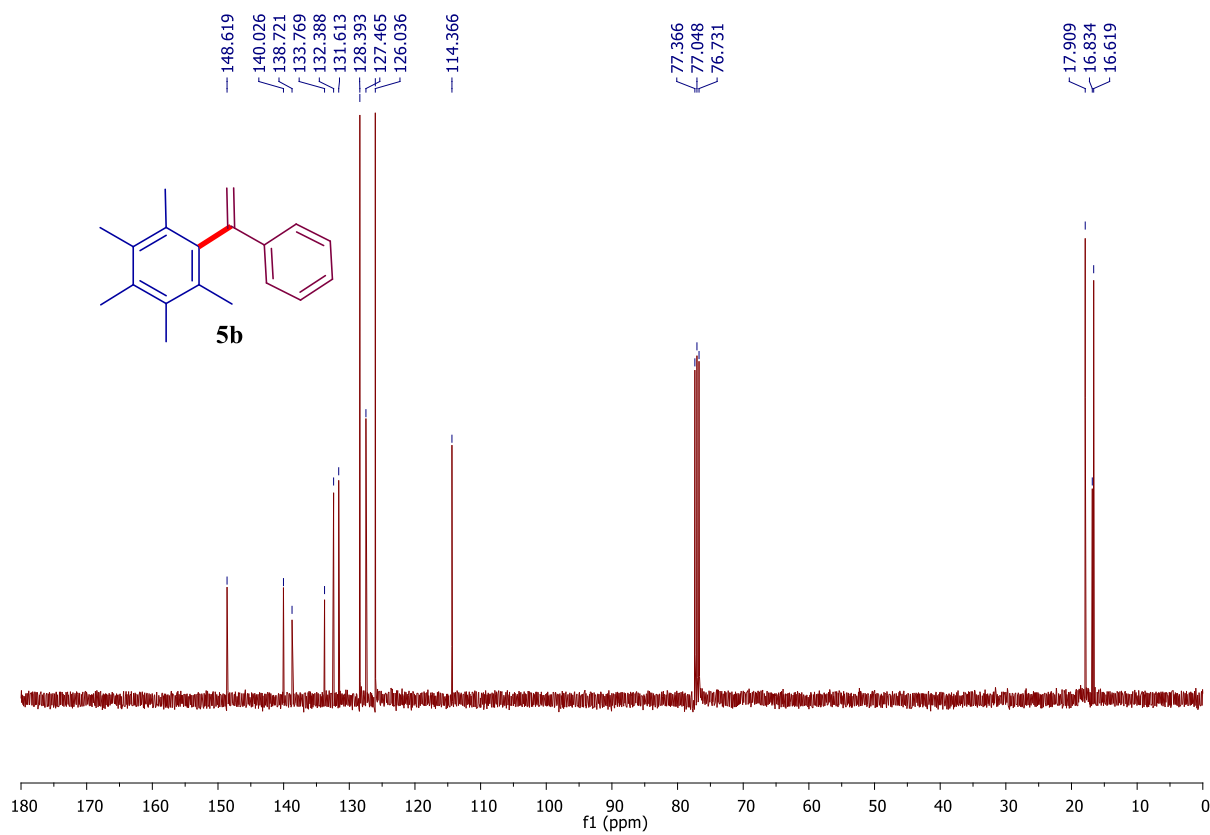

**Figure S34.** <sup>13</sup>C NMR Spectrum of **5b** in CDCl<sub>3</sub>.

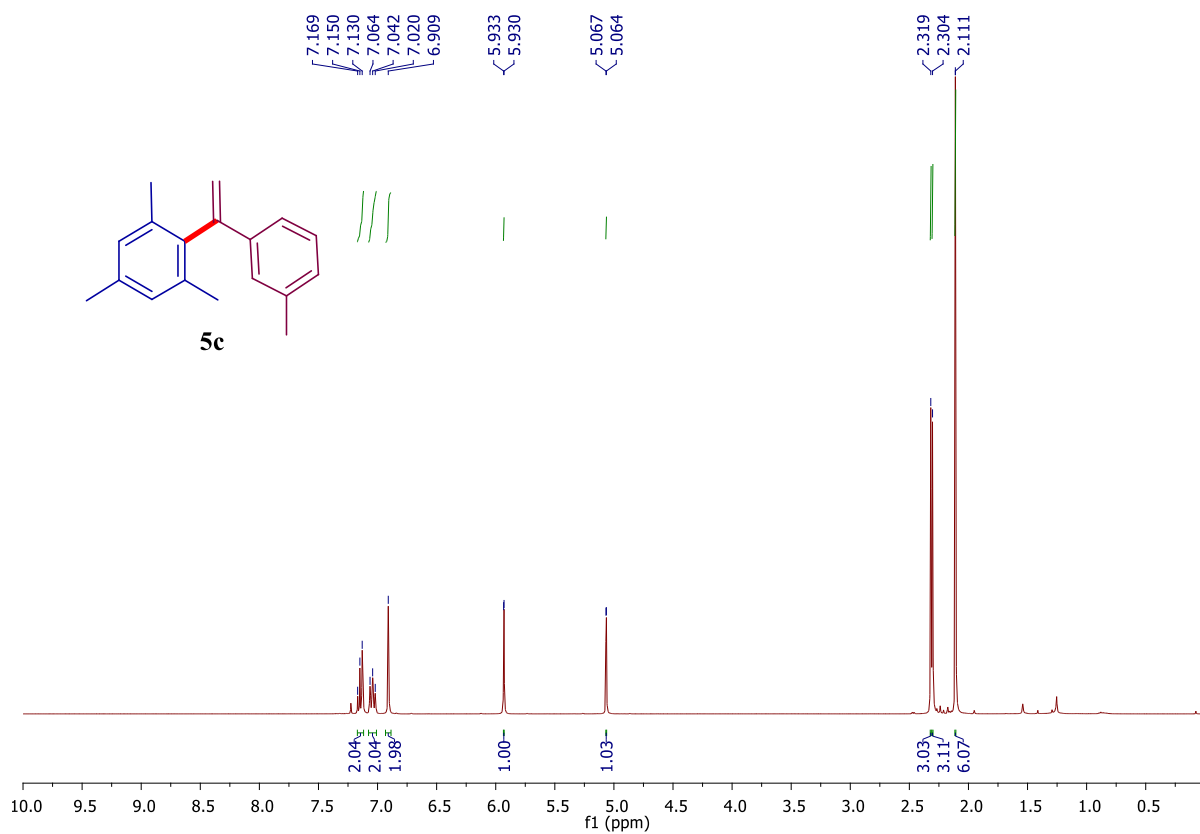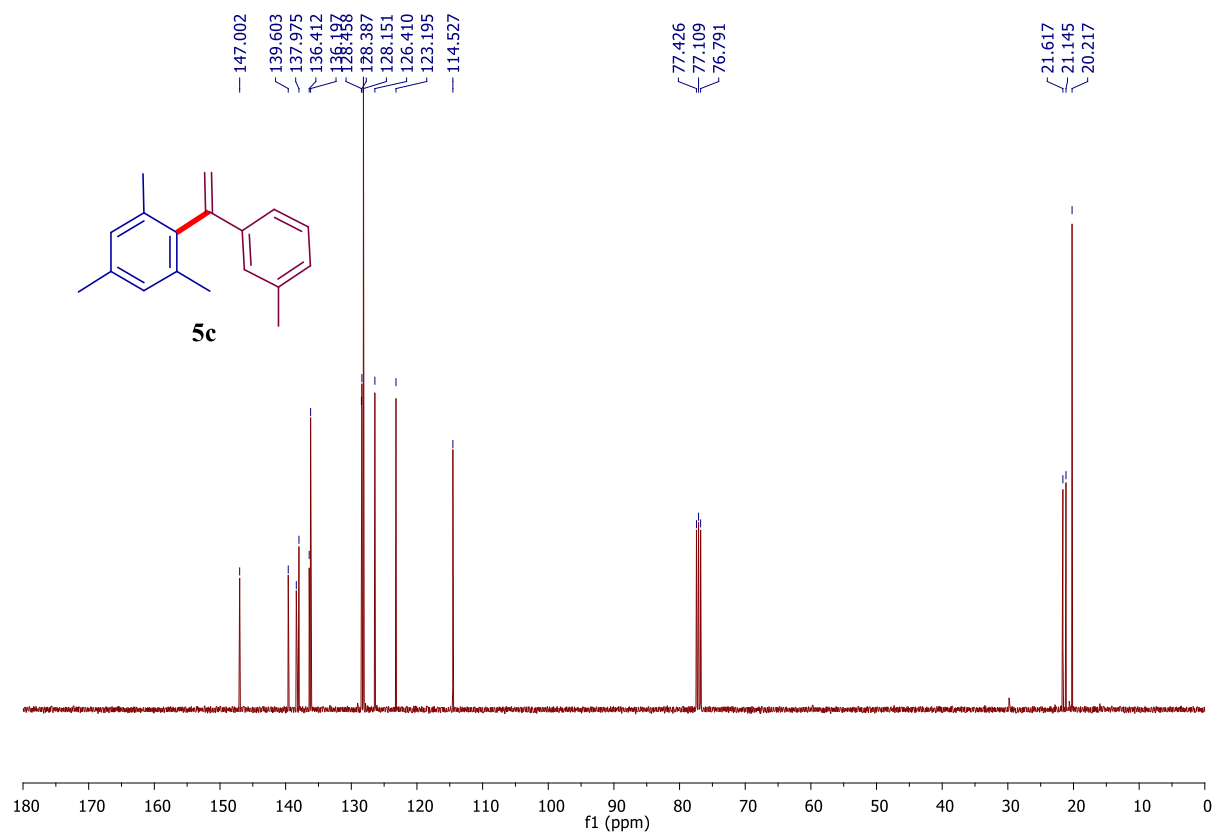

**Figure S36.  $^{13}\text{C}$  NMR Spectrum of **5c** in  $\text{CDCl}_3$ .**

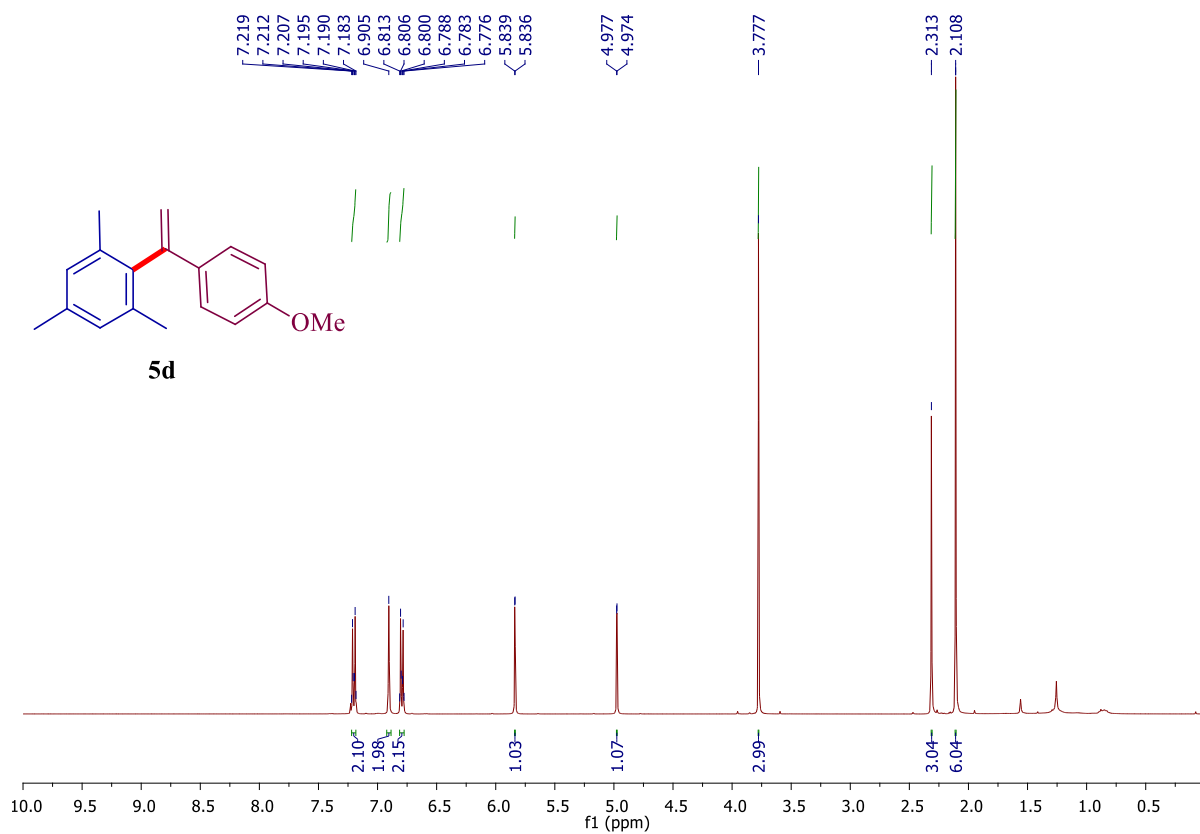

**Figure S37.** <sup>1</sup>H NMR Spectrum of **5d** in CDCl<sub>3</sub>.

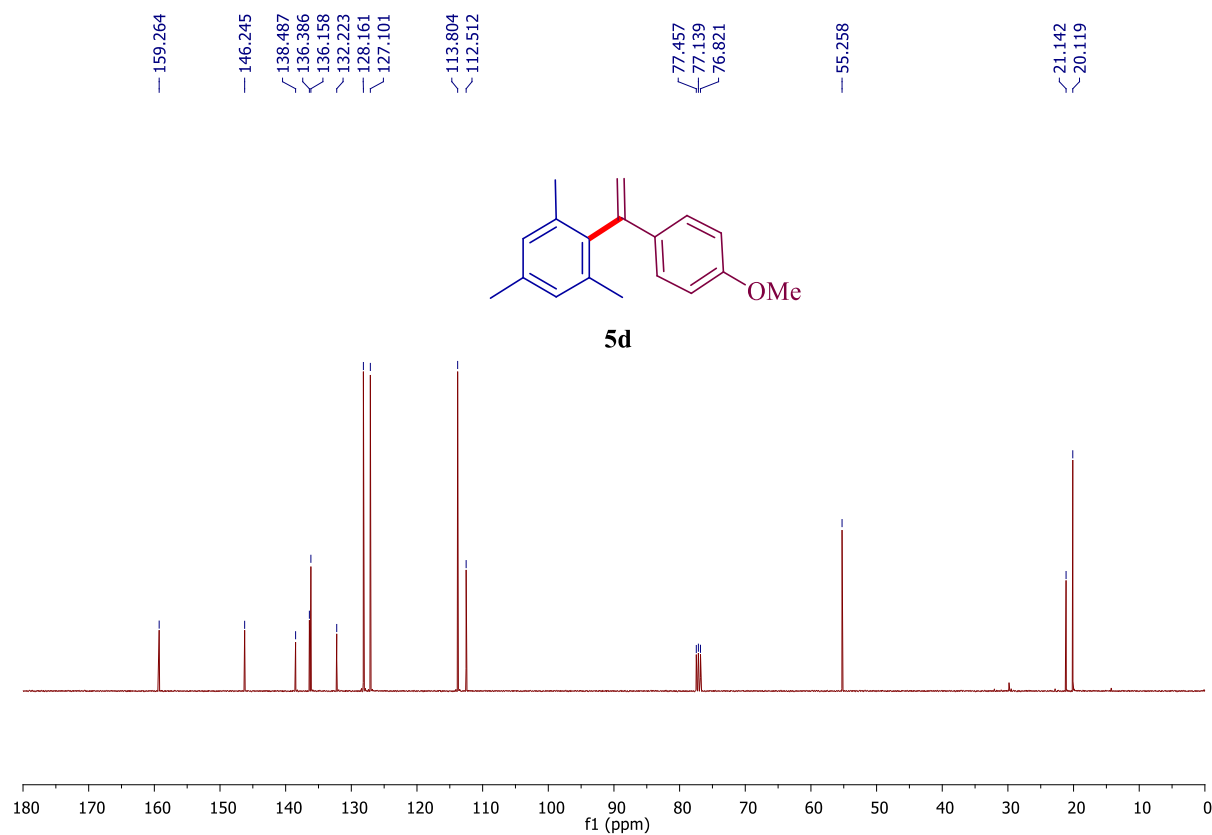

**Figure S38.** <sup>13</sup>C NMR Spectrum of **5d** in CDCl<sub>3</sub>.



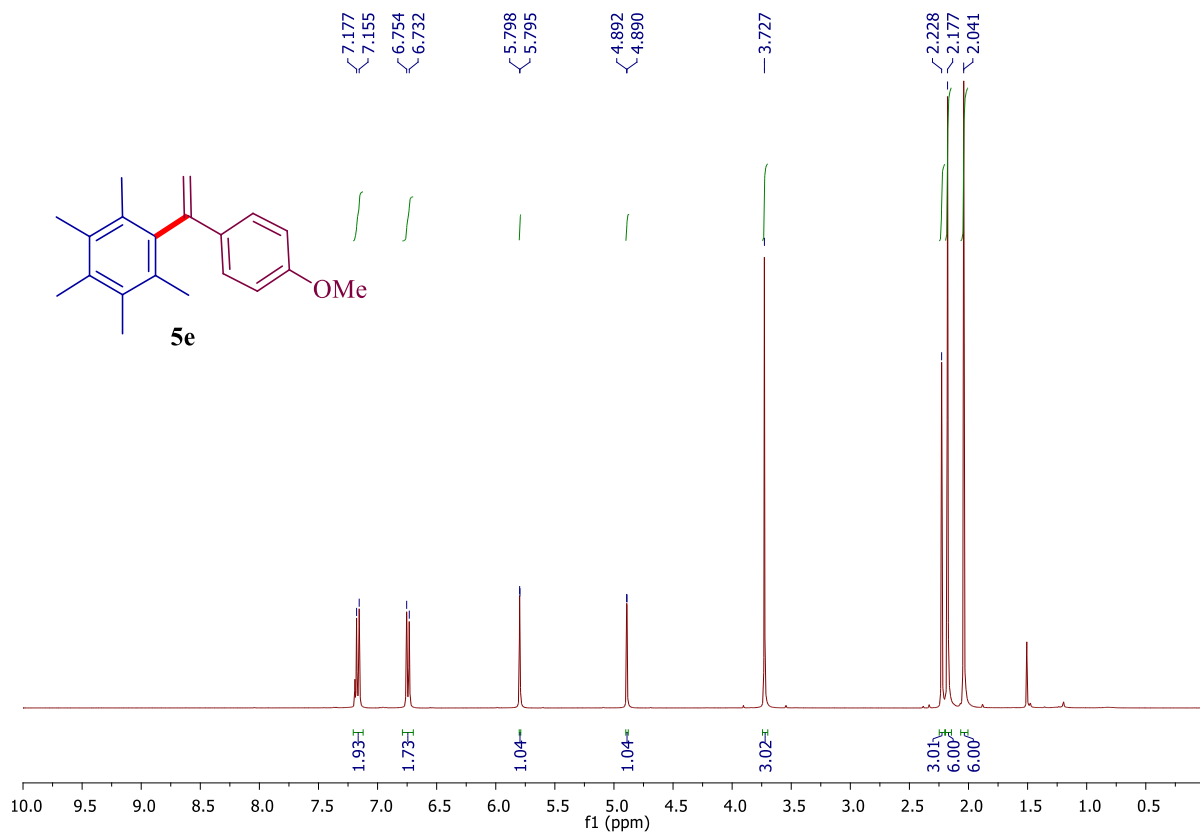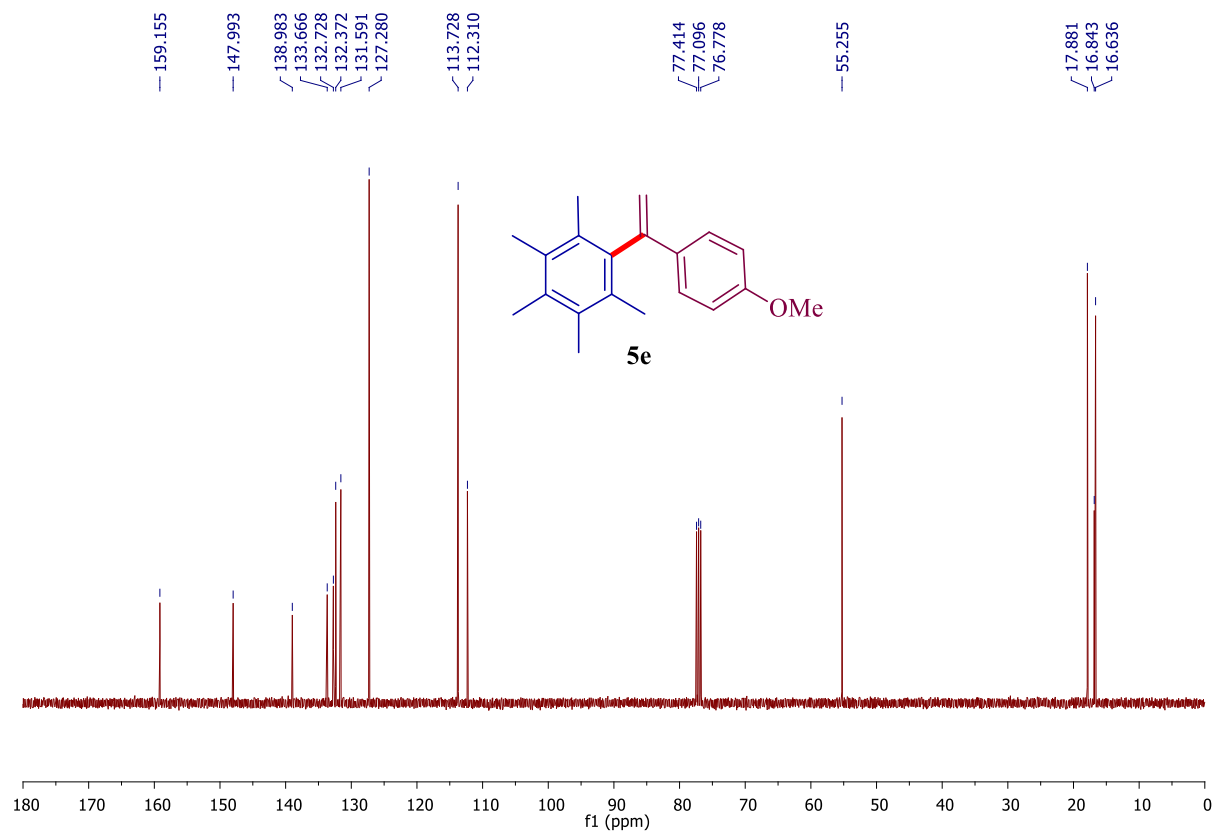

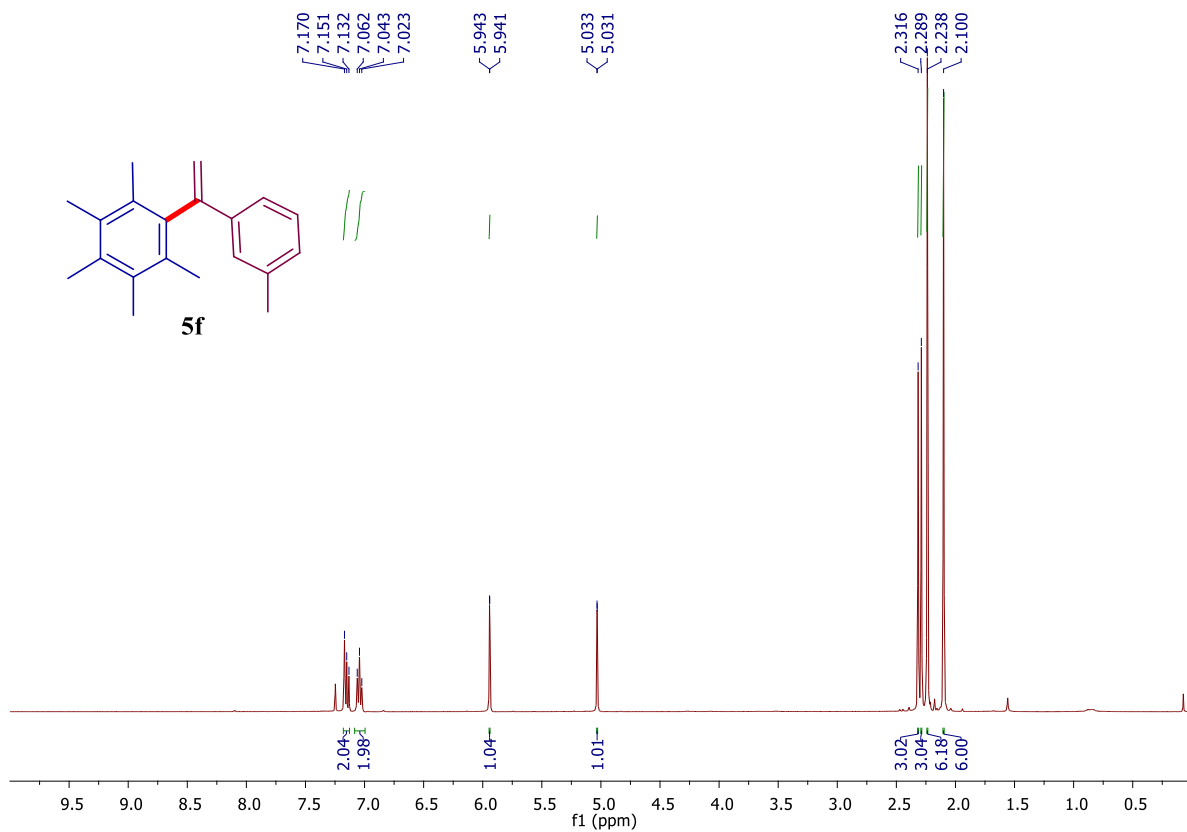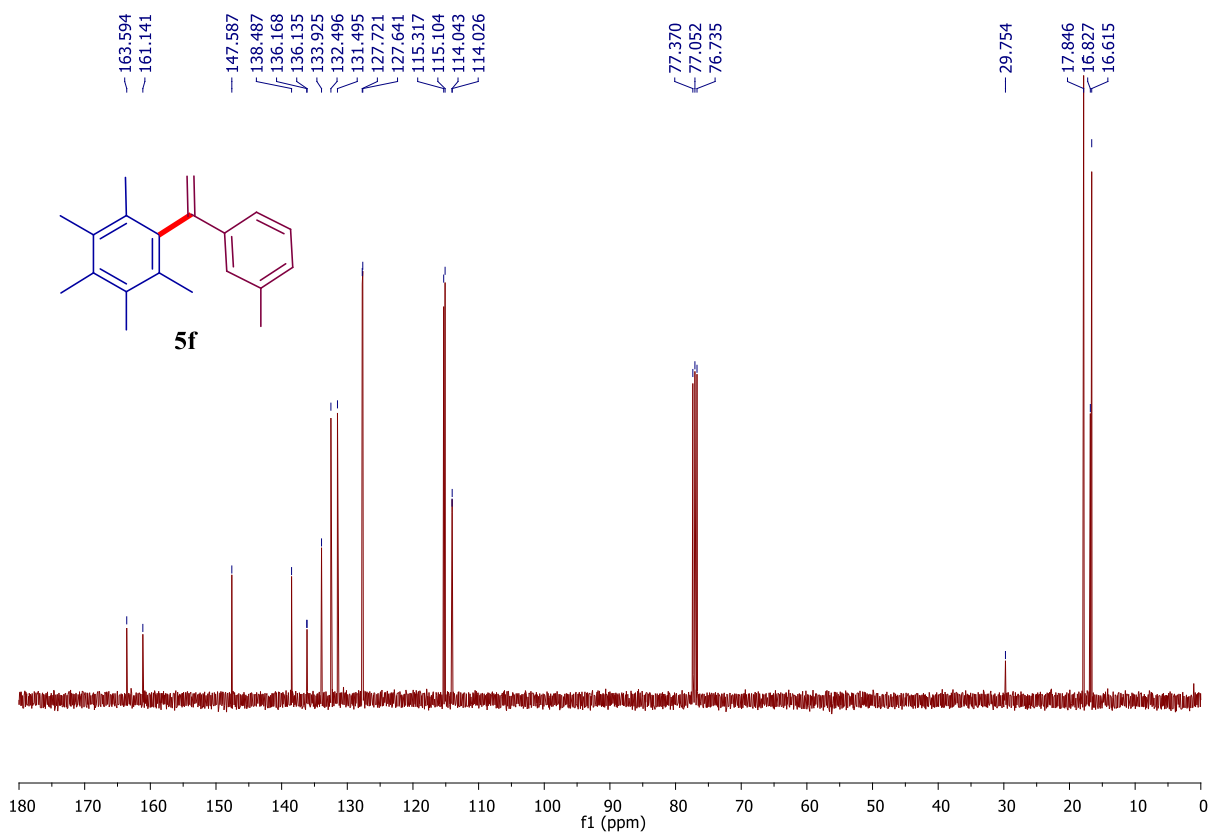

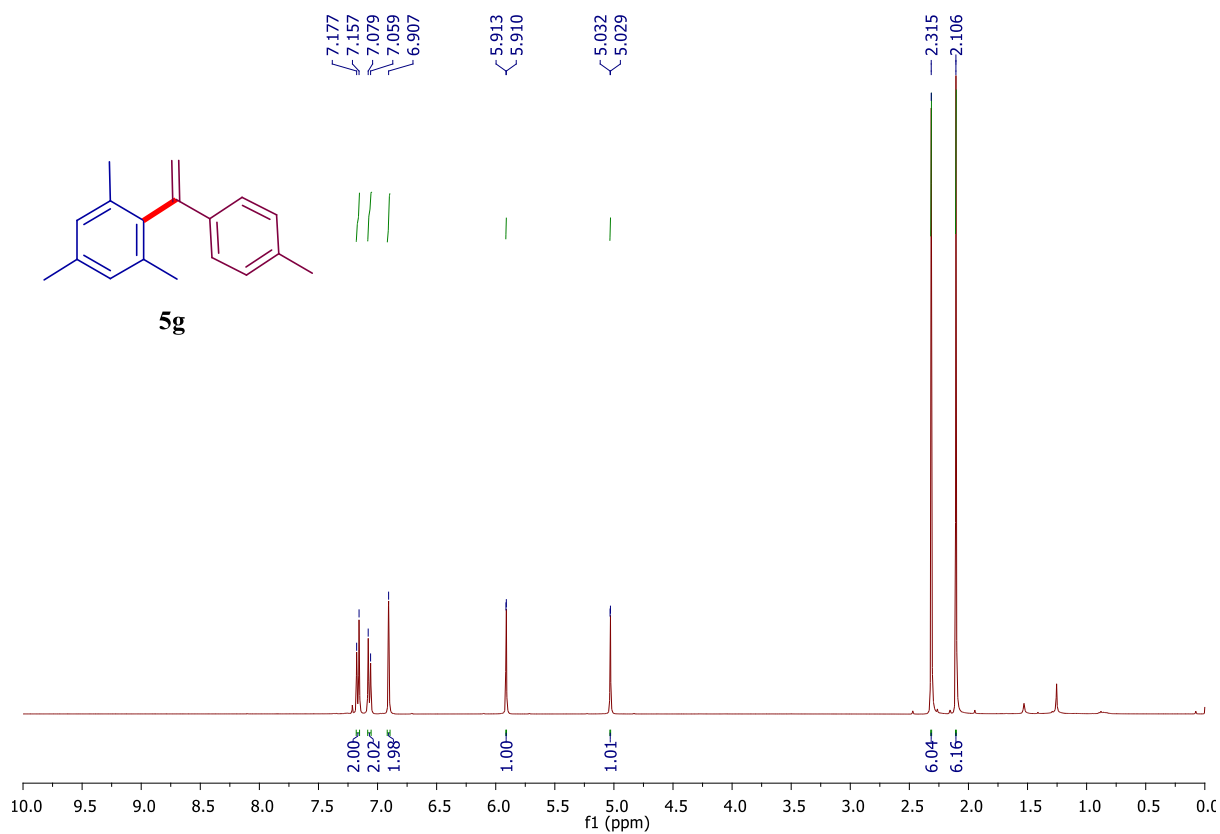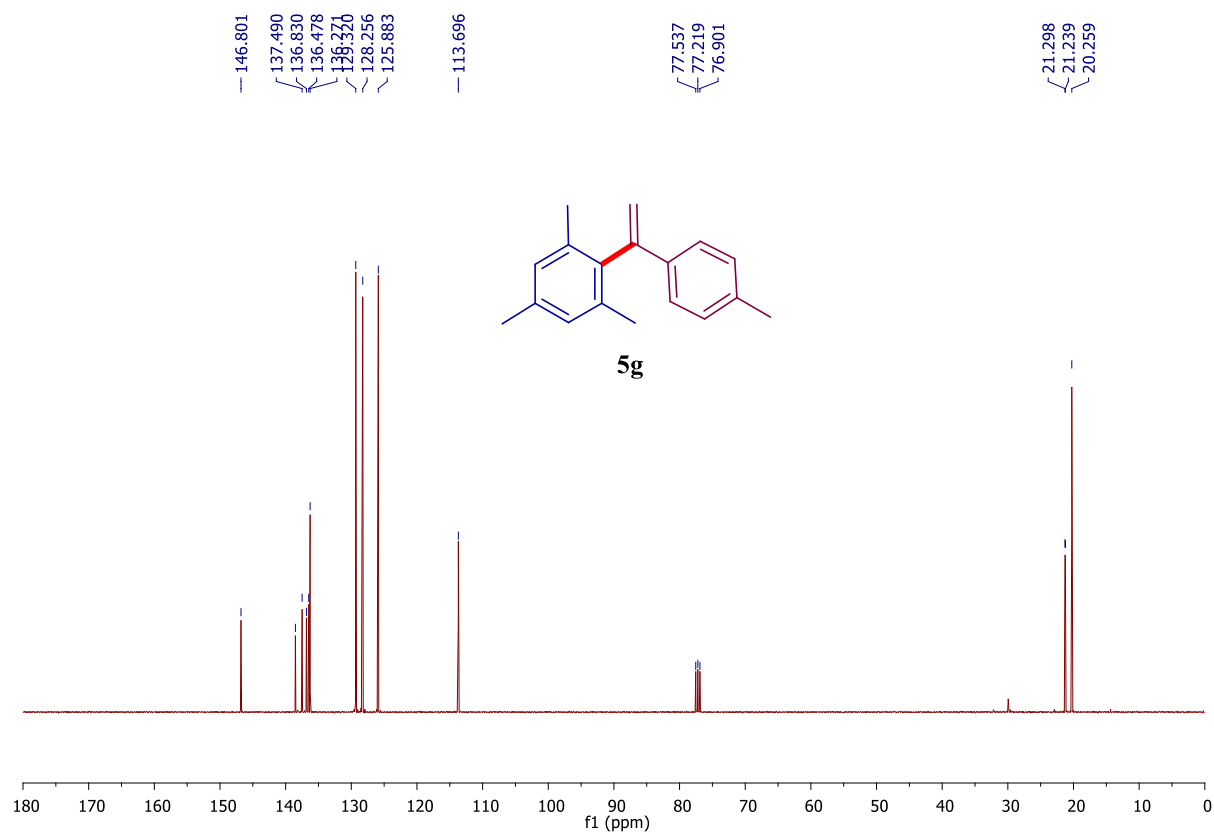

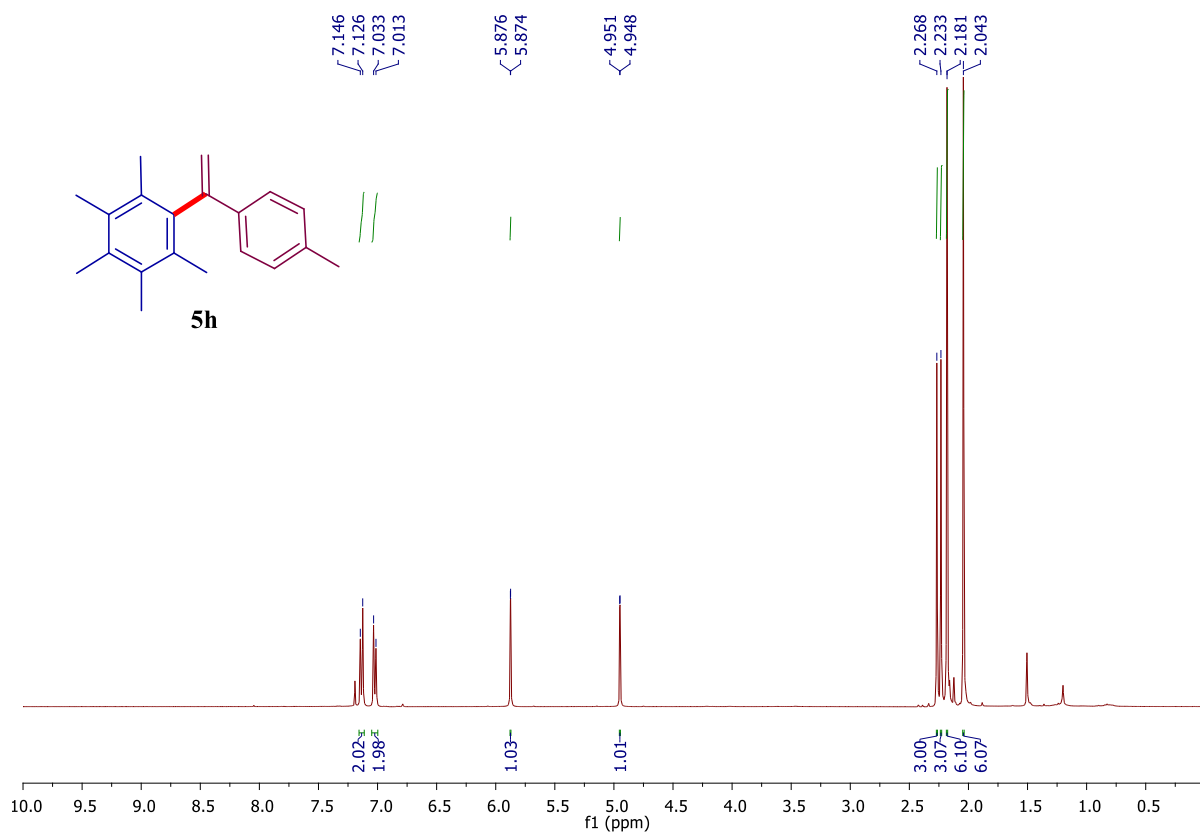

**Figure S45.** <sup>1</sup>H NMR Spectrum of **5h** in CDCl<sub>3</sub>.

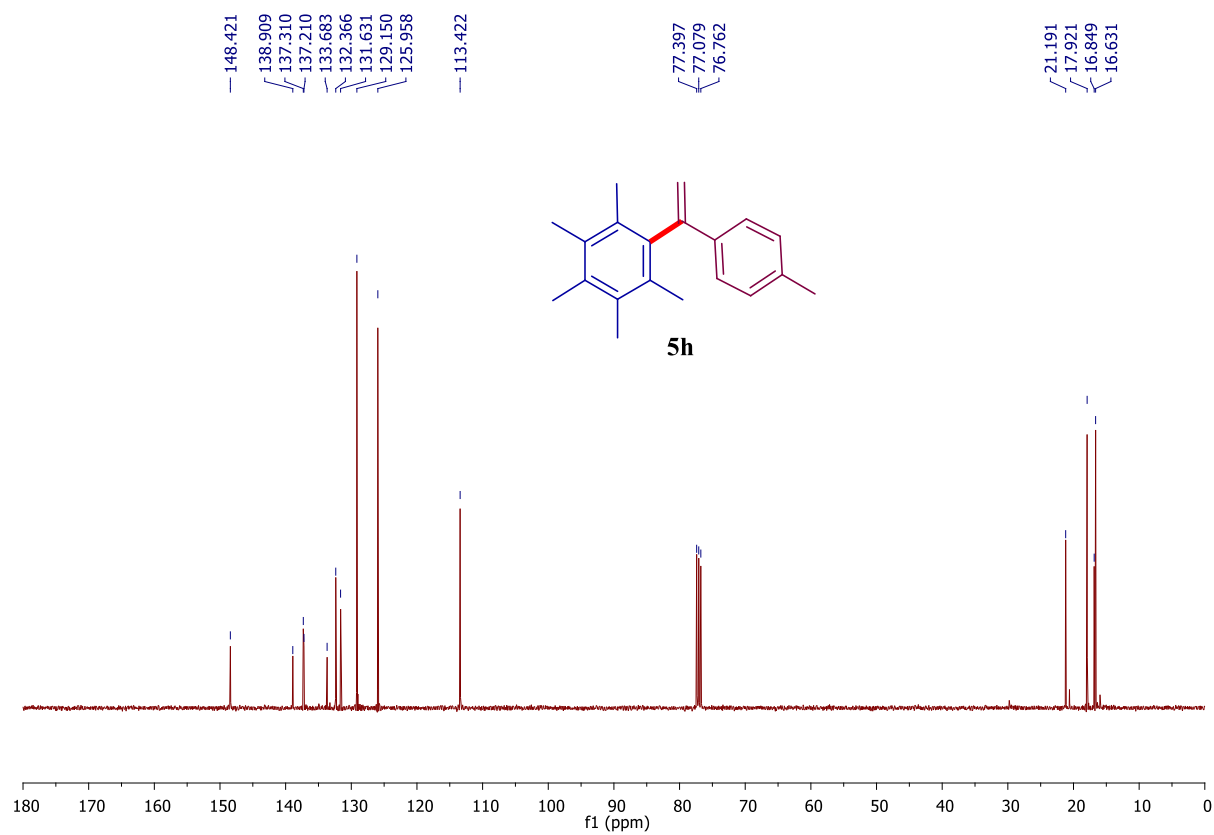

**Figure S46.** <sup>13</sup>C NMR Spectrum of **5h** in CDCl<sub>3</sub>.

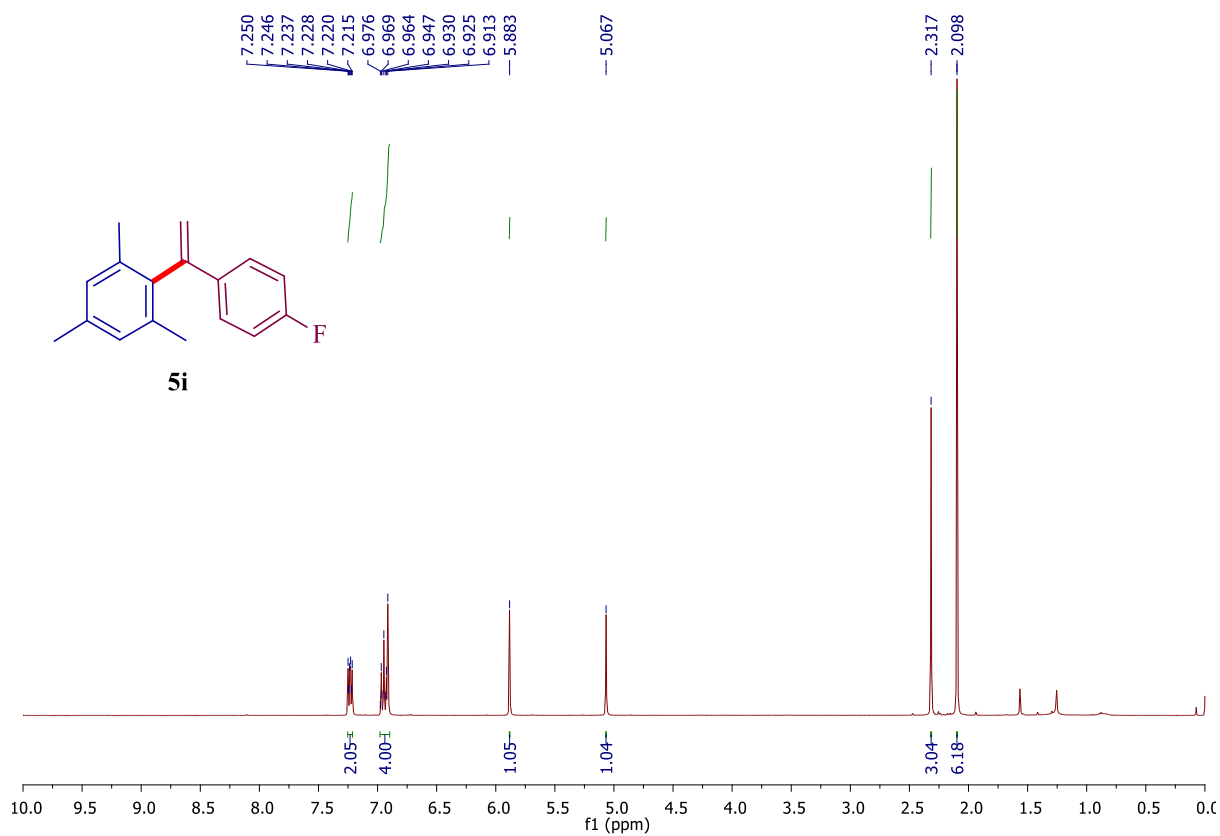

**Figure S47.** <sup>1</sup>H NMR Spectrum of **5i** in CDCl<sub>3</sub>.

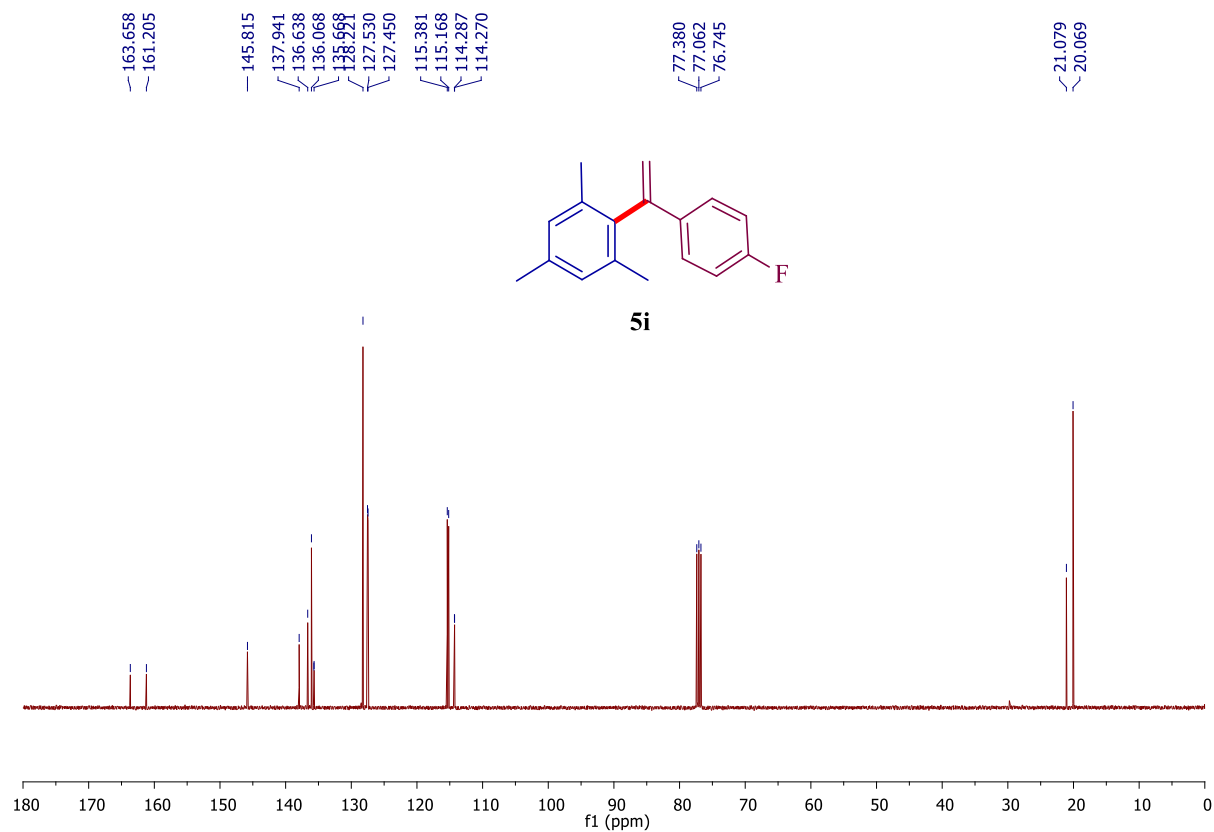

**Figure S48.** <sup>13</sup>C NMR Spectrum of **5i** in CDCl<sub>3</sub>.

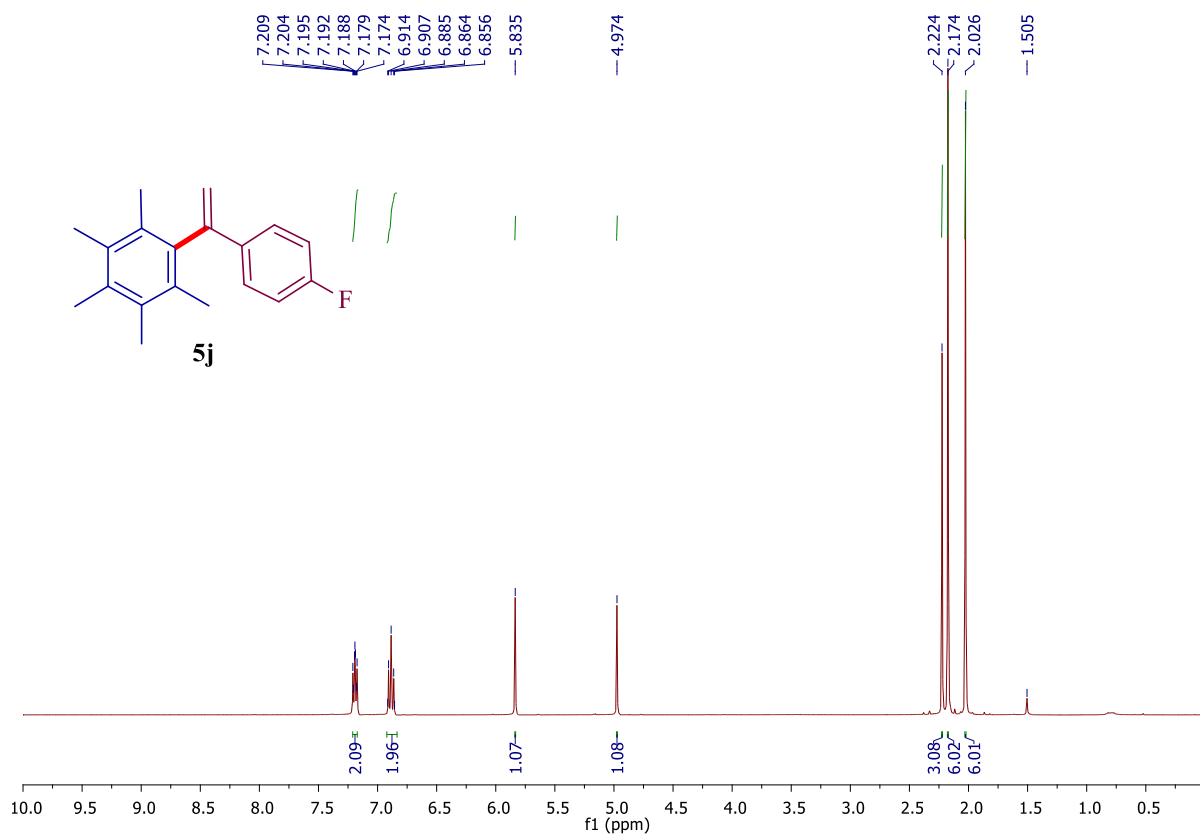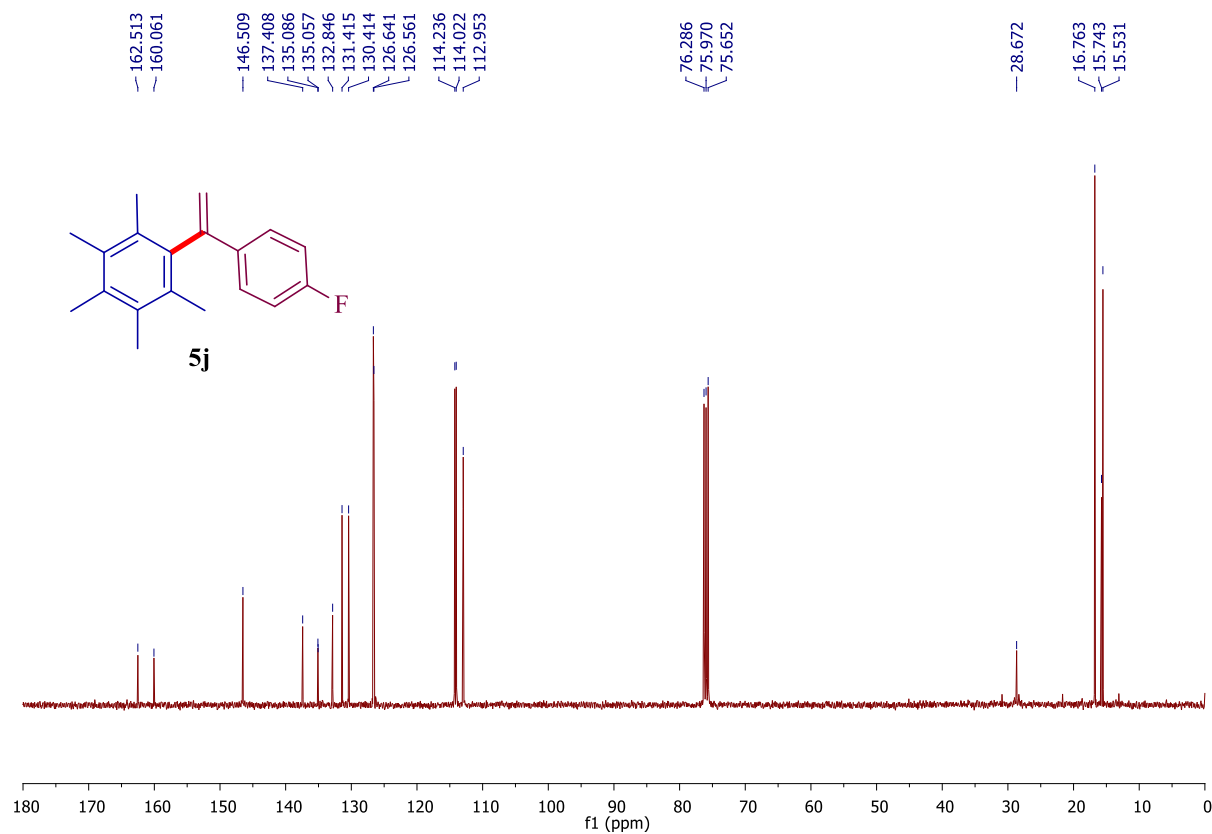

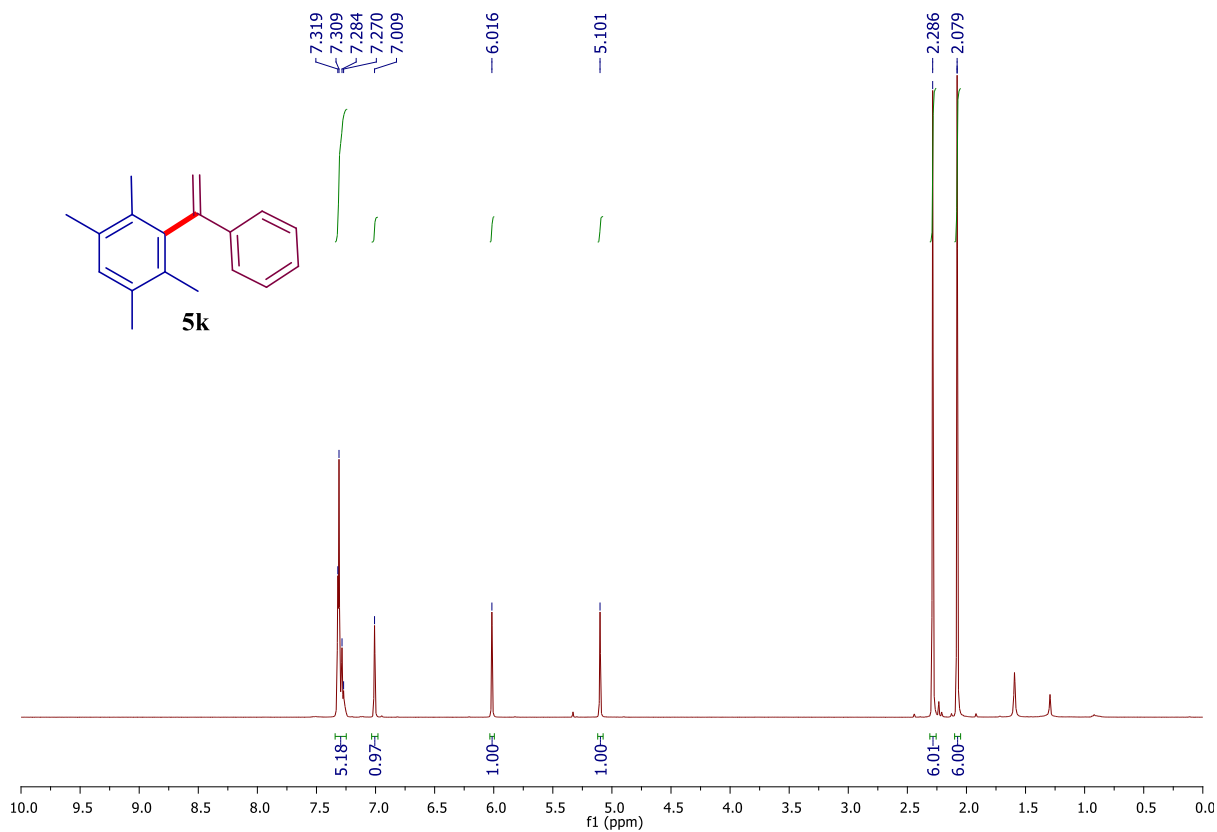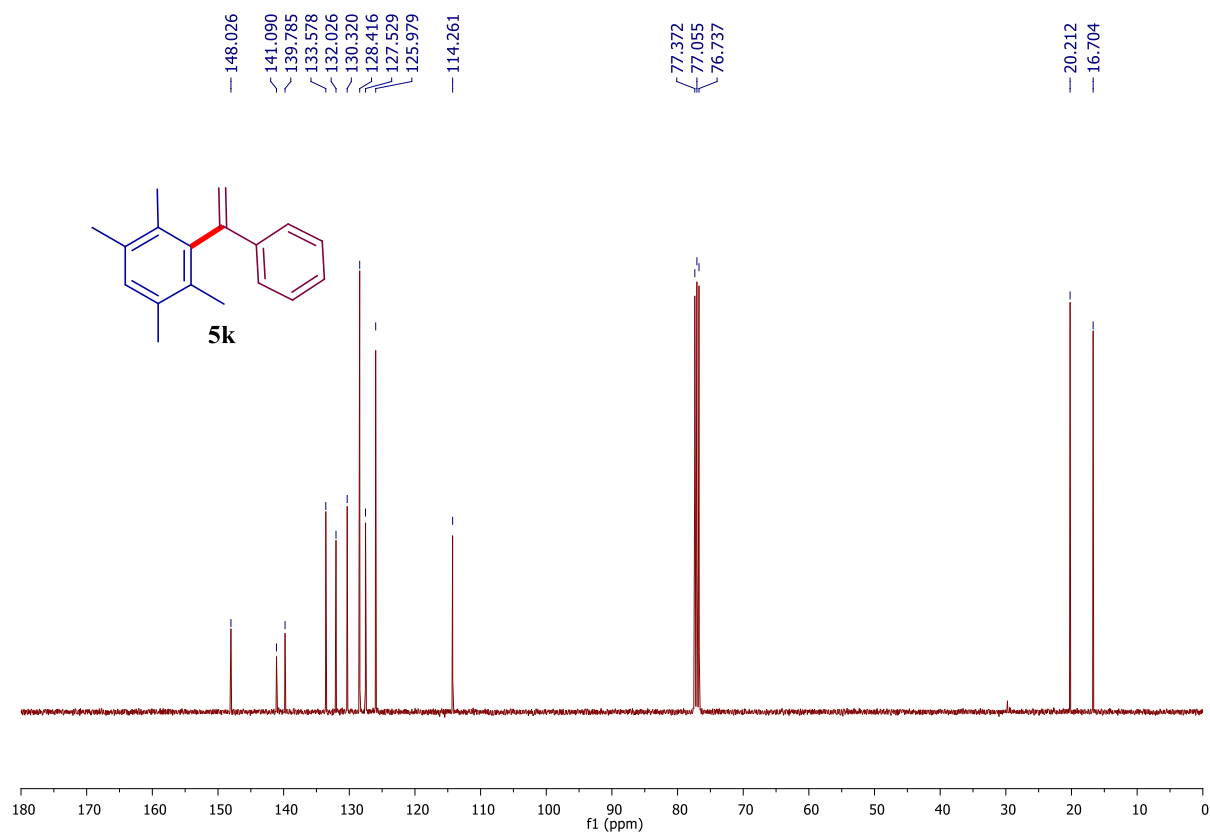

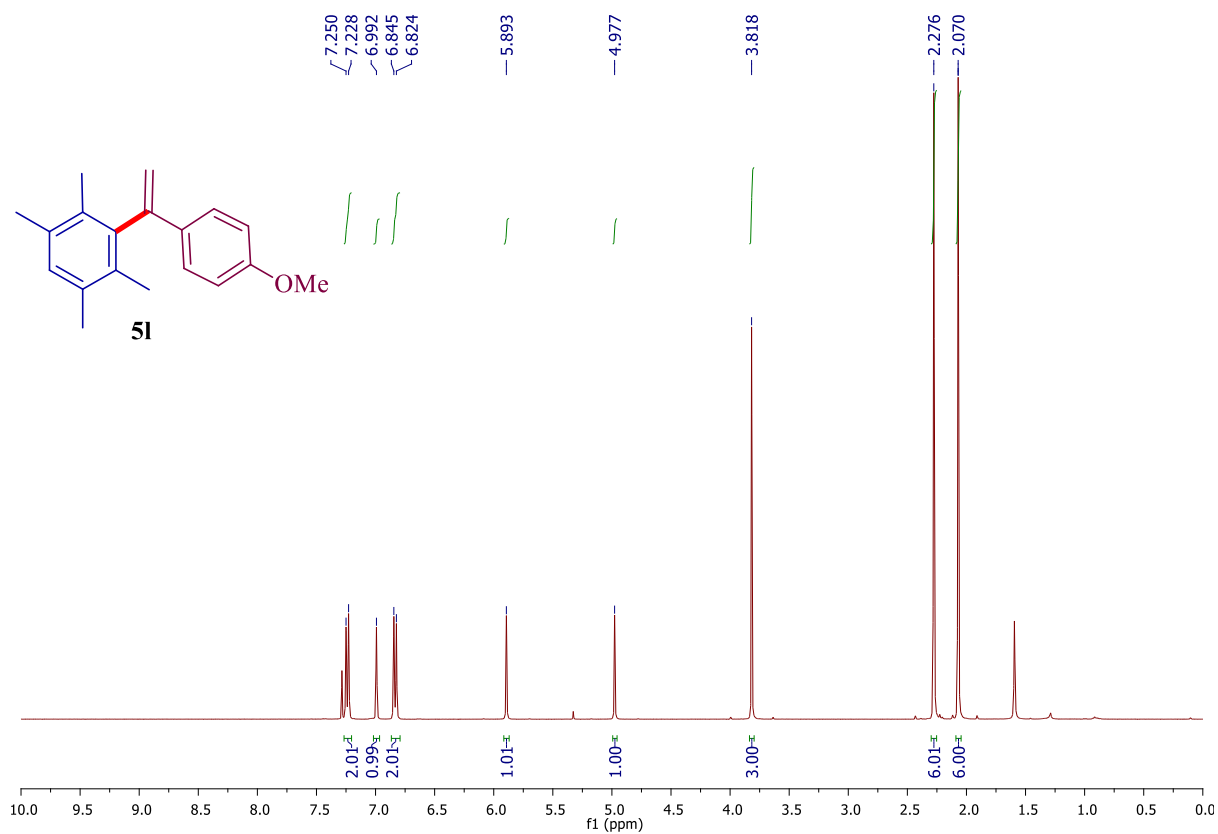

**Figure S53.** <sup>1</sup>H NMR Spectrum of **51** in CDCl<sub>3</sub>.

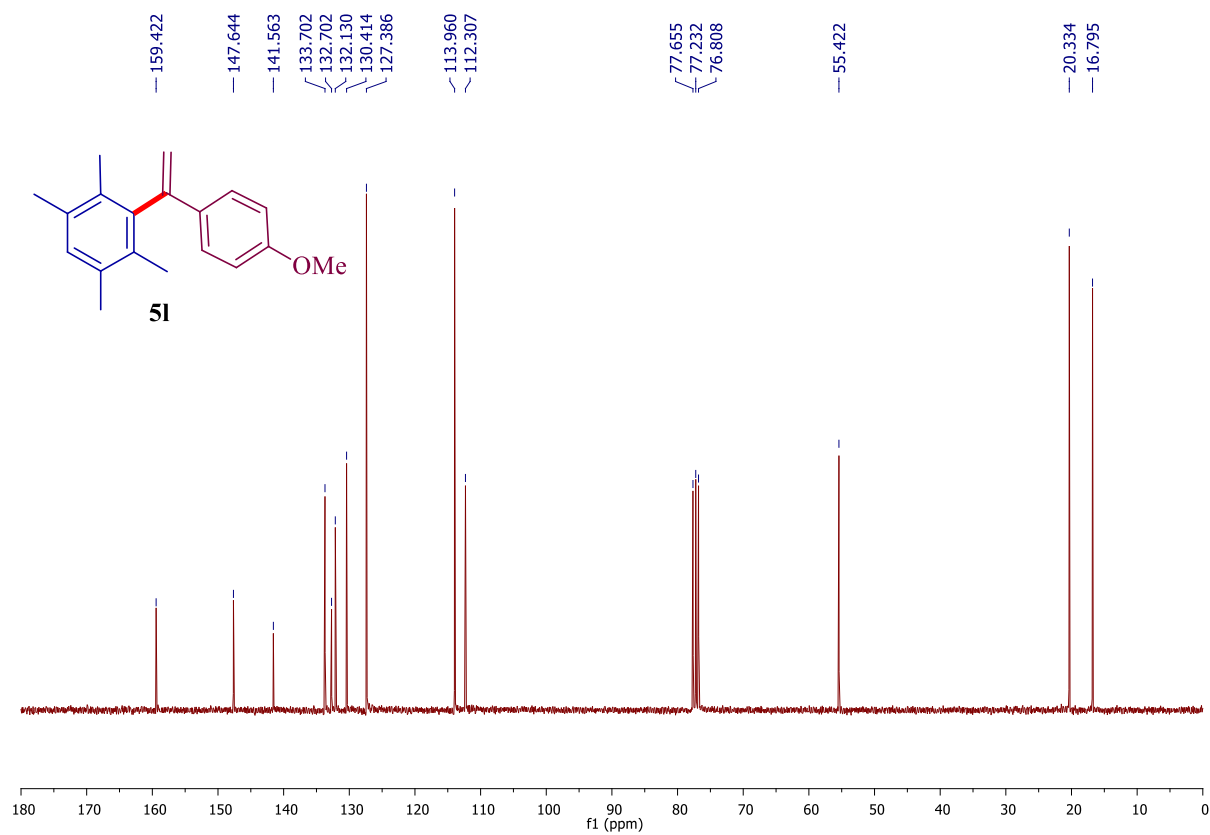

**Figure S54.** <sup>13</sup>C NMR Spectrum of **51** in CDCl<sub>3</sub>.



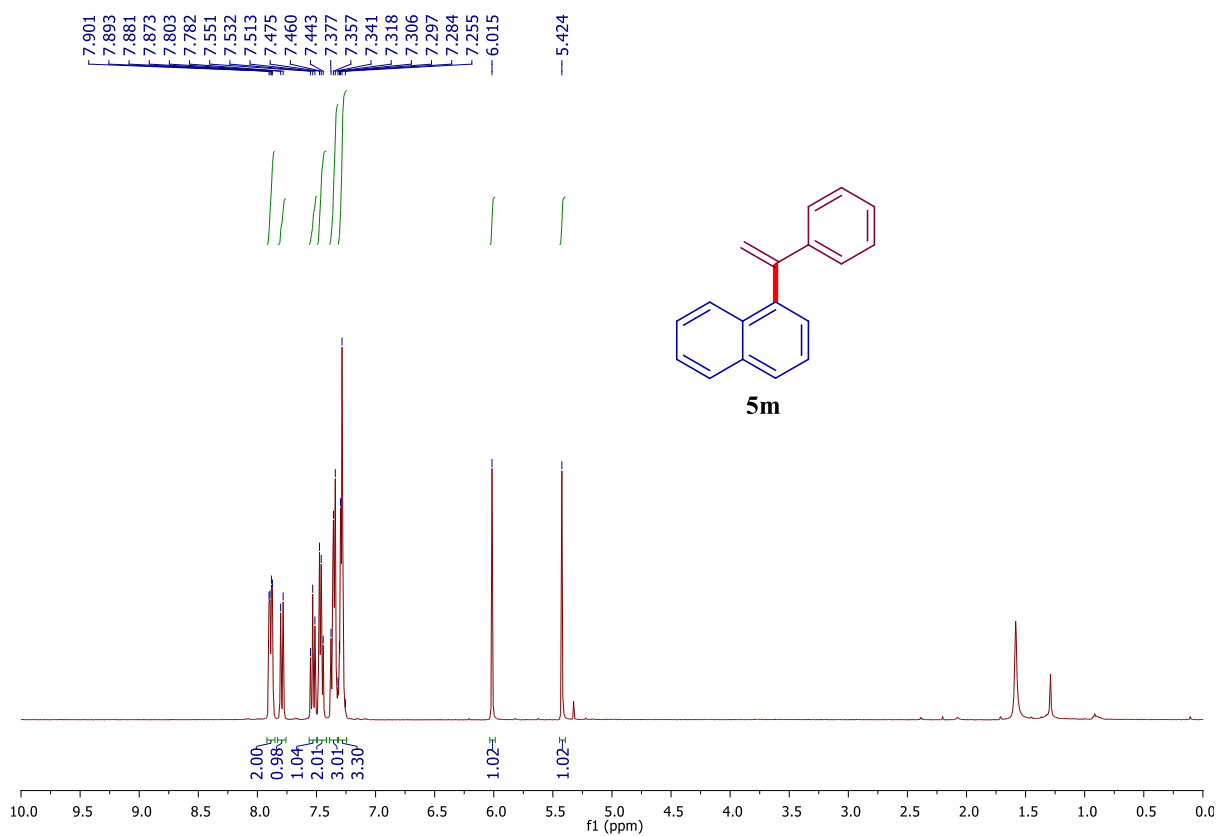

**Figure S55.** <sup>1</sup>H NMR Spectrum of **5m** in CDCl<sub>3</sub>.

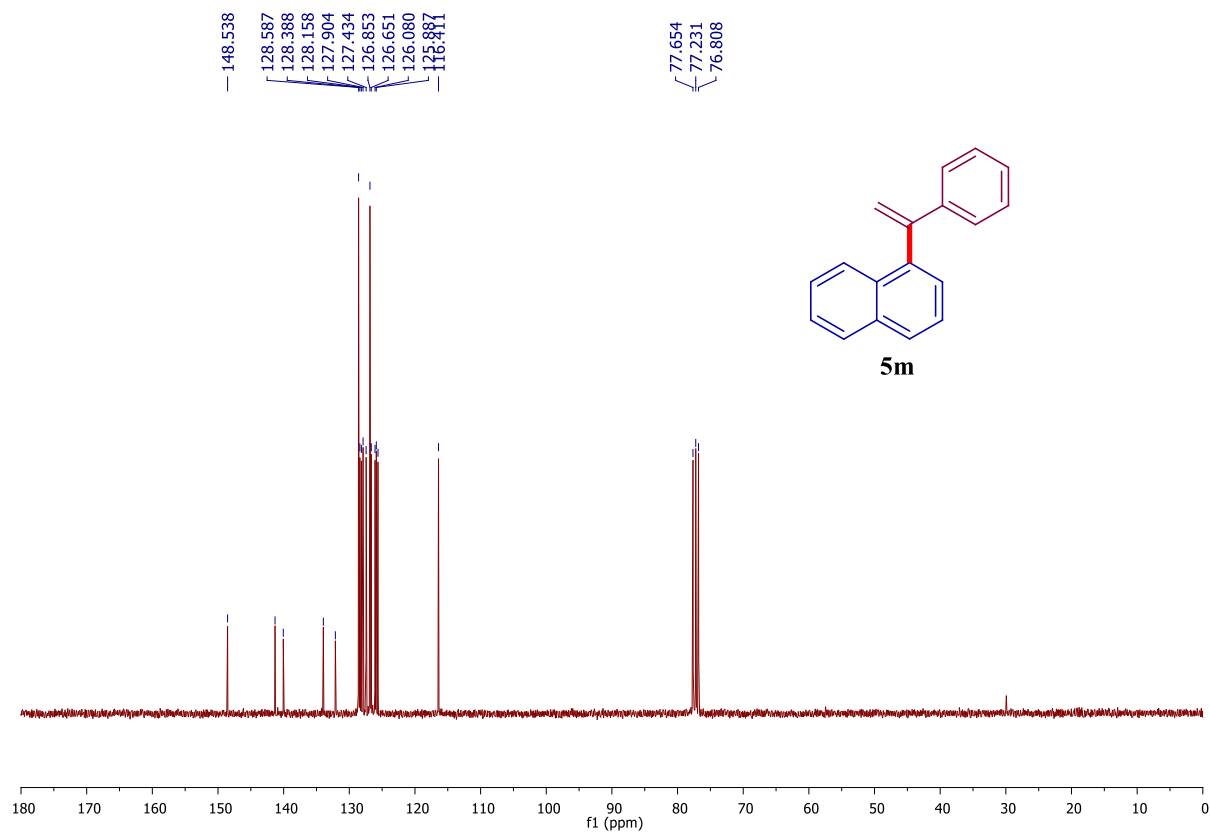

**Figure S56.** <sup>13</sup>C NMR Spectrum of **5m** in CDCl<sub>3</sub>.
